# Supplementary material for: Which National Factors Are Most Influential in the Spread of COVID-19?
Source: MDPI journal article supplement (doi:10.3390/ijerph18147592), 2021-07-16
Supplement: s1 [file s1]

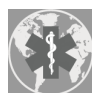

## Supplementary Information- Which National Factors are Most Influential in the Spread of COVID-19?

**Table S1.** List of the national factors used.

| Summary of national factors |                              |                                  |                                                                                                                        |
|-----------------------------|------------------------------|----------------------------------|------------------------------------------------------------------------------------------------------------------------|
| Source                      | Category                     | Variable name                    | Variable information                                                                                                   |
| Our World in Data           | Territory, Population        | Population (2020)                | Population in 2020                                                                                                     |
|                             |                              | Population Density (2020)        | The number of people in a given area divided by the area of the given area. Usually expressed as population per $km^2$ |
|                             | National Accounts            | GDP per capita                   | Gross domestic product divided by the number of people                                                                 |
|                             | Age                          | Median Age (2020)                | Median age of the population, UN projection for 2020                                                                   |
|                             |                              | Aged 65 older                    | Share of the population that is 65 years and older, most recent year available                                         |
|                             |                              | Age 70 older (2015)              | Share of the population that is 70 years and older in 2015                                                             |
|                             |                              | Life Expectancy (2019)           | The average number of years a 0-year-old is expected to survive in the future                                          |
|                             | Health, Society, And Welfare | Cardiovascular Death Rate (2017) | Death rate from cardiovascular disease in 2017 (annual number of deaths per 100,000 people)                            |
|                             |                              | Diabetes Prevalence (2017)       | Diabetes prevalence (% of population aged 20 to 79) in 2017                                                            |
|                             |                              | Female Smokers                   | Share of women who smoke, most recent year available                                                                   |
|                             |                              | Male Smokers                     | Share of men who smoke, most recent year available                                                                     |
|                             |                              | Handwashing Facilities           | Share of the population with basic handwashing facilities on premises, most recent year available                      |
|                             |                              | Hospital Beds per thousand       | Hospital beds per 1,000 people, most recent year available since 2010                                                  |
|                             |                              | Extreme Poverty                  | Share of the population living in extreme poverty, most recent year available since 2010                               |
|                             | Education, Culture, Science  | Human Development Index          | Summary measure of average achievement in key dimensions of human development: a long and healthy                      |

|       |                                    |                                          |                                                                                                                                                                                                                                     |
|-------|------------------------------------|------------------------------------------|-------------------------------------------------------------------------------------------------------------------------------------------------------------------------------------------------------------------------------------|
| KOSIS |                                    |                                          | life, being knowledgeable and have a decent standard of living                                                                                                                                                                      |
|       | <i>Trade</i>                       | Exports to GDP Ratio (2016)              |                                                                                                                                                                                                                                     |
|       |                                    | Imports to GDP Ratio (2016)              |                                                                                                                                                                                                                                     |
|       | <i>Environment</i>                 | Average Annual Temperature (1961-1990)   | 30-year statistics from 1961 to 1990 based on observed temperature                                                                                                                                                                  |
|       |                                    | Annual Precipitation (1961-1990)         | 30-year statistics from 1961 to 1990 based on observed precipitation                                                                                                                                                                |
|       | <i>National Accounts</i>           | Gross Domestic Product (2018)            | A monetary measure of the market value of all the final goods and services produced in a specific time period                                                                                                                       |
|       |                                    | Proportion of Urban Population (2018)    | The proportion of the population living in urban areas among the total population (However, the concept of cities in each country is different, and the urban population of each country is based on the census of each country.)   |
|       | <i>Territory, Population</i>       | Total Fertility Rate (2020)              | Average of the number of children a woman has in her lifetime                                                                                                                                                                       |
|       |                                    | Net Migration Rate (2020)                | The number of the number of transferees minus the number of transferees over a specific period divided by the total population of the period                                                                                        |
|       | <i>Education, Culture, Science</i> | Number of international travelers (2017) | The number of foreign tourists with each country's nationality expressed in units of thousands                                                                                                                                      |
|       |                                    | Number of foreign visitors (2017)        | The number of foreign visitors to each country expressed in units of thousands                                                                                                                                                      |
|       |                                    | National Competitiveness (2019)          | The ranking of national competitiveness announced by the Swiss Institute of International Business Development (IMD) (Consider areas such as economic performance, government efficiency, corporate efficiency, and infrastructure) |
|       |                                    | Infant vaccination rate (2017)           | The infant immunization rate is the percentage of infants 12 to 23 months of age who were vaccinated 12 months before or before the                                                                                                 |

|     |                                              |                                                                                                                                                                      |
|-----|----------------------------------------------|----------------------------------------------------------------------------------------------------------------------------------------------------------------------|
|     |                                              | investigation of four diseases, measles and DPT (diphtheria, whooping cough, tetanus)                                                                                |
|     | Public Social Welfare Expenditure (2016)     | Social benefits or financial assistance by public institutions while households or individuals are in a disadvantaged environment (Expressed as a percentage of GDP) |
|     | Pharmaceutical Sales (2018)                  | Total sales based on the retail price of the drug's final sales, classified by ATC code (Anatomical Therapeutic Chemical Classification System)                      |
|     | Percentage of malnourished population (2016) | Percentage of the population who consistently consume food at a level lower than the minimum dietary energy consumption                                              |
| Age | Aging index (2020)                           | (Population over the age of 65 in the current year ÷ Population between 0 and 14 in the current year) × 100                                                          |

### Pseudo-code of Segmentation Algorithm

Here, we denote  $\hat{f}(t)$  by  $Y_t$ .

#### Algorithm 1 Peak Detection Algorithm

**Input:**  $Y_i$  where  $i \in \{1, 2, \dots, t_{max}\}$

**Output:**  $I$

```

1. (Initialization)
declare  $t = 4, I = \emptyset, c = 0.1 \operatorname{argmax}_{i \in T} |\Delta^2 Y_i|$  where  $T = \{1, 2, \dots, t_{max} - 2\}$ ;

2. (Local maximum condition)
  while  $t = t_{max} - 4$  do
    while  $t = t_{max} - 4$  do
      if  $\Delta Y_t \cdot \Delta Y_{t+1} \leq 0, \Delta^2 Y_t \leq -c$  then
         $I \leftarrow I \cup \{t\}; t \leftarrow t + 1;$ 
      end if
    end while
  end while

3. (Excluding small peaks)
  if  $I = \emptyset$  then
     $I \leftarrow I - \{i | i \in I, Y_i \leq 0.2 Y_{max}\};$ 
  end if

4. (Resolution criteria)
  if  $n(I) < 2$  then
    declare  $p = 1, k = 1, A = \{i | I_k \leq i \leq I_{k+1}\}$  where  $I_j$  is the  $j$ -th smallest integer in  $I$ ;
    while  $p \leq n(I) - 1$  do
      if  $\operatorname{argmax}_{i \in A} Y_i \geq 0.8 \max\{Y_k, Y_{k+1}\}$  then
        if  $Y_k \leq Y_{k+1}$  then
           $I \leftarrow I - \{I_k\};$ 
        else
           $I \leftarrow I - \{I_{k+1}\};$ 
        end if
      end if
    end while
  end if

```

---

```

        else
         $k \leftarrow k + 1$ 
        end if
         $p \leftarrow p+1$ 
    end if

5. (Exclude peaks which are vibrations on increasing trend)
    if  $n(I) \geq 1$  then
    declare  $z = I_{n(I)}, L = \{i | z \leq i \leq \min\{z + 30, t_{max}\}\}$ ;
    if  $z \leq \operatorname{argmin}_{i \in L} Y_i$  then
         $I \leftarrow I - \{z\}$ 
    end if
    end if

```

---

**Algorithm 2 Breakpoint Detection Algorithm**

---

**Input:**  $Y_i$  where  $i \in \{1, 2, \dots, t_{max}\}$   
**Output:**  $B$

---

```

1. (Initialization)
declare  $B = \emptyset, c = 0.1 \max(|\Delta Y_i|)$ ;

2. (Between peaks)
    if  $n(I) \geq 2$  then
    for each  $j \in \{1, 2, \dots, (n(I) - 1)\}$  do
         $B \leftarrow B \cup \{\operatorname{argmin}_i Y_i | i = (I_j + 1), \dots, I_{j+1}\}$ ;
    end do
    end if

3. (After the last peak)
declare  $U = \{i \in \{(I_{n(I)} + 1), \dots, t_{max}\} | \Delta Y_i \geq c\}$ ;
    if  $n(I) \geq 1, n(U) \geq 5$  then
         $B \leftarrow B \cup \{\operatorname{argmin}_i Y_i | i = (I_{n(I)} + 1), \dots, t_{max}\}$ ;
    end if

```

---

**Figure S1.** Pseudo-codes for the Segmentation Algorithm.

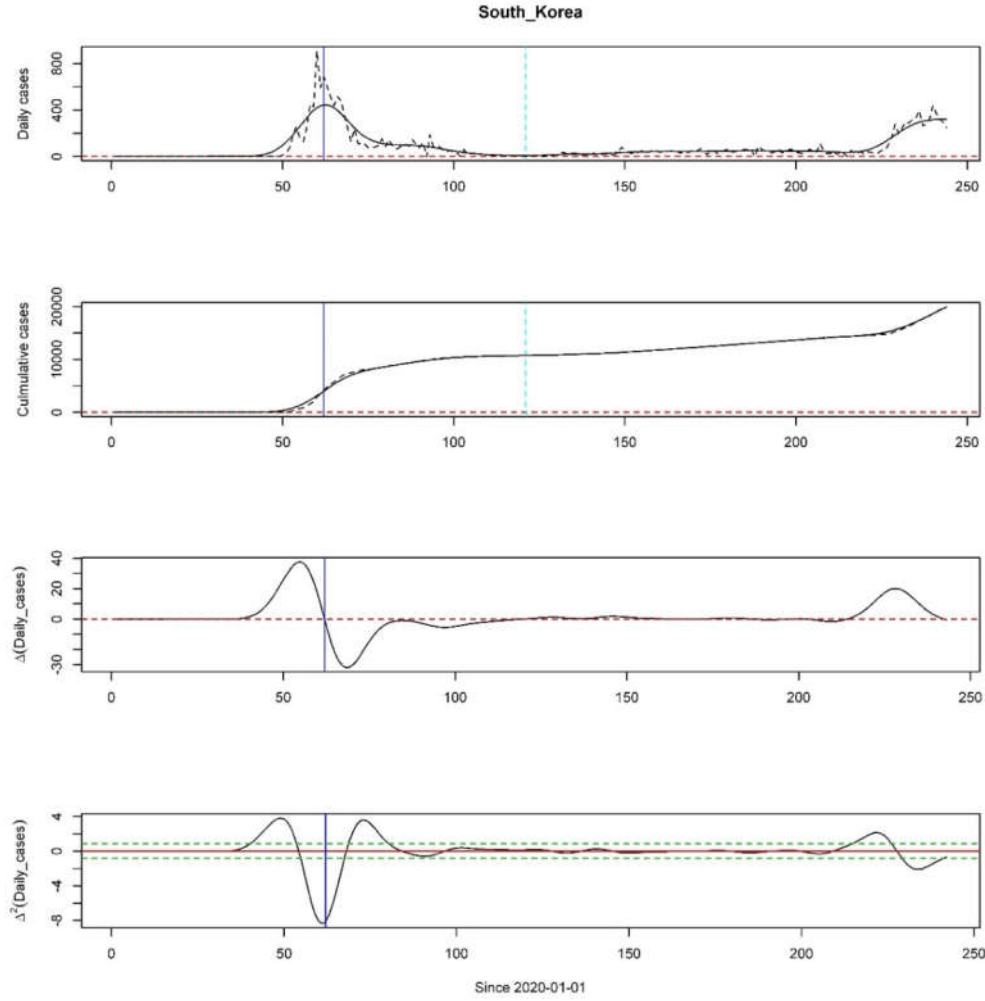

**Figure S2. Segmentation algorithm applied to South Korea's COVID-19 daily new confirmed cases.** The blue line represents the peak and dotted sky-blue line represents breakpoint. In the 1<sup>st</sup> plot, black solid line represents  $\hat{f}(t)$  and black dotted line represents  $Y_t$ . The 2<sup>nd</sup> plot represents cumulative confirmed cases of  $Y_t$  (black dotted line),  $\hat{f}(t)$  (black solid line). 3<sup>rd</sup>, 4<sup>th</sup> plots are graphs of  $\Delta\hat{f}(t)$ ,  $\Delta^2\hat{f}(t)$ . In 4<sup>th</sup> plot, green dotted line represents sensitivity level. If  $\Delta^2\hat{f}(t)$  is above the upper green dotted line,  $\hat{f}(t)$  is concave. On the other hand, if  $\Delta^2\hat{f}(t)$  is below the lower green dotted line,  $\hat{f}(t)$  is convex.

**Table S2. Parameter values estimated from segmented Logistic model.**  $\alpha$  is the maximum number of predicted cumulative confirmed cases,  $\beta$  is the time when we start to see a rise in the number of confirmed cases,  $\gamma$  is the increase rate of the number of confirmed cases. NA indicates no values returned due to failure of the model to converge.

| Segmented Logistic Model |                          |             |         |          |                |         |          |        |
|--------------------------|--------------------------|-------------|---------|----------|----------------|---------|----------|--------|
| 1st Segment              |                          |             |         |          | 2nd Segment    |         |          | MSSE   |
| Country                  | Maximum Cumulative cases | $\alpha$    | $\beta$ | $\gamma$ | $\alpha$       | $\beta$ | $\gamma$ |        |
| Afghanistan              | 38162                    | 37269.8509  | 5.6770  | 0.0743   | NA             | NA      | NA       | 0.0285 |
| Albania                  | 9380                     | 29521.2462  | 5.3078  | 0.0268   | NA             | NA      | NA       | 0.0292 |
| Algeria                  | 44146                    | 12006.8756  | 3.7504  | 0.0622   | 34805.885<br>2 | 3.8383  | 0.0758   | 0.0296 |
| Angola                   | 2624                     | 3210.7931   | 5.3484  | 0.0605   | NA             | NA      | NA       | 0.1101 |
| Argentina                | 401226                   | 648605.7127 | 7.0822  | 0.0434   | NA             | NA      | NA       | 0.0253 |
| Armenia                  | 43750                    | 43766.2039  | 5.5276  | 0.0542   | NA             | NA      | NA       | 0.0164 |
| Aruba                    | 1997                     | 2036.3519   | 23.7171 | 0.1651   | NA             | NA      | NA       | 0.4136 |
| Australia                | 25670                    | 6874.2219   | 5.5232  | 0.1993   | 19130.884<br>8 | 5.7873  | 0.1019   | 0.0723 |

|                                     |         |              |         |        |                 |        |        |        |
|-------------------------------------|---------|--------------|---------|--------|-----------------|--------|--------|--------|
| Austria                             | 27218   | 15908.5183   | 4.2740  | 0.1596 | 16850.155<br>1  | 3.8620 | 0.0498 | 0.1512 |
| Azerbaijan                          | 36309   | 39349.2968   | 5.7054  | 0.0523 | 2314.9887       | 3.1543 | 0.3069 | 0.0355 |
| Bahamas                             | 2167    | 2725.7862    | 11.5786 | 0.0902 | NA              | NA     | NA     | 0.1529 |
| Bahrain                             | 51574   | 52482.2417   | 5.2532  | 0.0432 | NA              | NA     | NA     | 0.0522 |
| Bangladesh                          | 310822  | 309918.2068  | 4.8411  | 0.0488 | NA              | NA     | NA     | 0.0632 |
| Belarus                             | 71687   | 67674.9628   | 4.3724  | 0.0640 | 3143.6539       | 3.1136 | 0.2155 | 0.0513 |
| Belgium                             | 85442   | 59026.3230   | 4.1785  | 0.1002 | 25594.525<br>6  | 4.4737 | 0.0989 | 0.0589 |
| Bolivia                             | 115968  | 136119.5696  | 5.7989  | 0.0465 | NA              | NA     | NA     | 0.0150 |
| Bosnia and Herze-<br>govina         | 19789   | NA           | NA      | NA     | NA              | NA     | NA     | NA     |
| Brazil                              | 3862311 | 4453662.2090 | 5.5266  | 0.0408 | NA              | NA     | NA     | 0.0335 |
| Bulgaria                            | 16190   | 2847.4247    | 3.4207  | 0.0696 | 14226.613<br>5  | 4.0922 | 0.0691 | 0.0347 |
| Cameroon                            | 19142   | 21027.7178   | 4.5991  | 0.0509 | 6228.8127       | 2.3642 | 0.1062 | 0.2697 |
| Canada                              | 127940  | 102198.2467  | 4.1626  | 0.0711 | 23205.572<br>4  | 2.7602 | 0.0880 | 0.0676 |
| Cape Verde                          | 3852    | 451.6892     | 3.0462  | 0.1095 | 3709.0145       | 3.4858 | 0.0529 | 0.0886 |
| Central African Re-<br>public       | 4700    | 4681.4703    | 4.6191  | 0.0867 | NA              | NA     | NA     | 0.0584 |
| Chile                               | 409974  | 386213.7660  | 6.2397  | 0.0635 | NA              | NA     | NA     | 0.1951 |
| China                               | 89868   | 84438.2778   | 5.2721  | 0.1958 | NA              | NA     | NA     | 0.3252 |
| Colombia                            | 607938  | 1028559.6439 | 7.1185  | 0.0441 | NA              | NA     | NA     | 0.0114 |
| Congo                               | 3979    | 4512.6300    | 5.1438  | 0.0508 | NA              | NA     | NA     | 0.2155 |
| Costa Rica                          | 39699   | 53094.5266   | 8.5012  | 0.0555 | NA              | NA     | NA     | 0.0682 |
| Cote' d Ivoire                      | 17948   | 19182.4988   | 5.3947  | 0.0525 | 889.9903        | 3.0251 | 0.3372 | 0.0898 |
| Croatia                             | 10123   | 2171.0152    | 3.1237  | 0.1317 | 13184.828<br>9  | 4.3545 | 0.0482 | 0.2648 |
| Cuba                                | 3973    | 1856.7584    | 3.4571  | 0.1238 | 424.2954        | 3.0161 | 0.1868 | 0.0354 |
| Czechia                             | 24367   | 8425.2168    | 3.4373  | 0.1147 | 20390.745<br>8  | 3.6332 | 0.0476 | 0.1193 |
| Democratic Republic<br>of the Congo | 10044   | 9704.1760    | 4.8552  | 0.0575 | 208.7552        | 3.3273 | 0.6117 | 0.0521 |
| Denmark                             | 16700   | 12229.4185   | 3.0248  | 0.0747 | 4665.2456       | 4.2840 | 0.1044 | 0.1107 |
| Djibouti                            | 5385    | 1051.5098    | 4.9399  | 0.3115 | 3980.2177       | 4.0720 | 0.1357 | 0.2622 |
| Dominican Republic                  | 94241   | 143968.8886  | 4.5142  | 0.0321 | NA              | NA     | NA     | 0.0887 |
| Ecuador                             | 117639  | 41796.9588   | 5.4738  | 0.1175 | 84434.314<br>6  | 3.0774 | 0.0511 | 0.2161 |
| Egypt                               | 98727   | 99949.4036   | 6.4644  | 0.0618 | NA              | NA     | NA     | 0.0104 |
| El Salvador                         | 25729   | 34877.7380   | 5.4834  | 0.0438 | NA              | NA     | NA     | 0.0450 |
| Equatorial Guinea                   | 4941    | 1692.8579    | 3.5291  | 0.0881 | 1949.5310       | 5.0940 | 0.2163 | 0.6387 |
| Estonia                             | 2373    | 1856.0023    | 2.6937  | 0.1019 | 534.2583        | 4.6425 | 0.0788 | 0.2039 |
| Eswatini                            | 4561    | 6353.9951    | 5.1505  | 0.0475 | NA              | NA     | NA     | 0.0585 |
| Ethiopia                            | 51122   | NA           | NA      | NA     | NA              | NA     | NA     | NA     |
| Finland                             | 8077    | 7134.7878    | 3.2117  | 0.0755 | 1033.3456       | 4.0422 | 0.0980 | 0.0628 |
| France                              | 278709  | 147092.5435  | 4.6031  | 0.1069 | NA              | NA     | NA     | 0.1265 |
| Gabon                               | 8505    | 3546.9607    | 5.1536  | 0.1172 | 2908.7589       | 3.0856 | 0.1821 | 0.0465 |
| Gambia                              | 2963    | 3105.6876    | 6.4323  | 0.1387 | NA              | NA     | NA     | 0.0751 |
| Georgia                             | 1487    | 175285.9159  | 4.7540  | 0.1159 | 152925.95<br>58 | 3.6806 | 0.0373 | 0.0995 |
| Germany                             | 242381  | 9712.5829    | 5.4931  | 0.1023 | 41388.530<br>8  | 3.5723 | 0.0616 | 0.1187 |
| Greece                              | 10134   | 2731.1379    | 3.3367  | 0.1120 | NA              | NA     | NA     | 0.0929 |
| Guam                                | 1347    | NA           | NA      | NA     | NA              | NA     | NA     | NA     |
| Guatemala                           | 73912   | 80489.4110   | 6.0005  | 0.0525 | NA              | NA     | NA     | 0.0586 |

|             |         |              |         |        |                 |        |        |        |
|-------------|---------|--------------|---------|--------|-----------------|--------|--------|--------|
| Guinea      | 9371    | 5303.4292    | 3.3438  | 0.0680 | 4510.1775       | 2.8192 | 0.0736 | 0.0819 |
| Haiti       | 8209    | 7622.6502    | 4.7753  | 0.0824 | NA              | NA     | NA     | 0.1544 |
| Honduras    | 60174   | 56907.2114   | 6.3830  | 0.0564 | 11520.812<br>9  | 3.0437 | 0.2570 | 0.0551 |
| Hungary     | 5961    | 3964.0412    | 3.4650  | 0.0889 | 4036.5004       | 4.4656 | 0.0535 | 0.2645 |
| Iceland     | 2105    | 1782.3982    | 4.3145  | 0.1763 | 478.7850        | 7.1262 | 0.0717 | 0.1771 |
| India       | 3621245 | 6765888.4642 | 7.1224  | 0.0410 | NA              | NA     | NA     | 0.0045 |
| Indonesia   | 172053  | 245161.5902  | 4.7788  | 0.0316 | NA              | NA     | NA     | 0.0201 |
| Iran        | 373570  | 94307.3179   | 4.5510  | 0.1102 | 279269.44<br>35 | 2.9052 | 0.0432 | 0.0531 |
| Iraq        | 231177  | 286347.3795  | 7.2230  | 0.0466 | NA              | NA     | NA     | 0.0971 |
| Ireland     | 28760   | 25830.5125   | 4.2620  | 0.1063 | NA              | NA     | NA     | 0.1508 |
| Honduras    | 60174   | 16392.4036   | 4.3321  | 0.1391 | 81068.119<br>6  | 6.1544 | 0.0895 | 0.0666 |
| Italy       | 268366  | 234107.3748  | 4.0454  | 0.0874 | 152109.53<br>21 | 4.8147 | 0.0551 | 0.1475 |
| Jamaica     | 2357    | NA           | NA      | NA     | NA              | NA     | NA     | NA     |
| Japan       | 67865   | 16549.7588   | 7.8244  | 0.1231 | 58877.803<br>0  | 6.7353 | 0.0859 | 0.0472 |
| Kazakhstan  | 130673  | NA           | NA      | NA     | NA              | NA     | NA     | NA     |
| Kenya       | 34057   | 44506.1507   | 6.7577  | 0.0519 | NA              | NA     | NA     | 0.0686 |
| Kosovo      | 13334   | 19149.3567   | 5.9962  | 0.0424 | NA              | NA     | NA     | 0.1251 |
| Kuwait      | 84636   | 67873.6972   | 5.5275  | 0.0521 | 16566.520<br>9  | 2.7567 | 0.1815 | 0.1562 |
| Kyrgyzstan  | 43898   | 43306.2180   | 14.1798 | 0.1217 | NA              | NA     | NA     | 1.0229 |
| Lebanon     | 16870   | NA           | NA      | NA     | NA              | NA     | NA     | NA     |
| Luxembourg  | 8010    | 50974.5449   | 8.4007  | 0.0547 | NA              | NA     | NA     | 0.0772 |
| Madagascar  | 14843   | 3849.0711    | 3.0137  | 0.1560 | 3829.1249       | 5.4731 | 0.1022 | 0.1072 |
| Malawi      | 5536    | 15669.2011   | 9.1087  | 0.0789 | NA              | NA     | NA     | 0.0803 |
| Malaysia    | 9334    | 427.7014     | 7.2719  | 0.2915 | 5118.5363       | 3.6000 | 0.0826 | 0.0599 |
| Maldives    | 7667    | 6372.3634    | 3.9217  | 0.1149 | 2242.5502       | 2.1243 | 0.0925 | 0.2918 |
| Luxembourg  | 8010    | 2220.3578    | 3.0390  | 0.0913 | 6468.6466       | 4.3292 | 0.0850 | 0.1165 |
| Mauritania  | 7022    | 6640.6373    | 3.9054  | 0.0898 | NA              | NA     | NA     | 0.1372 |
| Mexico      | 641442  | 718779.9196  | 5.0133  | 0.0393 | NA              | NA     | NA     | 0.0171 |
| Moldova     | 36700   | 30054.5755   | 3.7987  | 0.0377 | 21681.302<br>3  | 2.9687 | 0.0787 | 0.0713 |
| Montenegro  | 4790    | 5040.4658    | 9.0828  | 0.0713 | 555.1335        | 3.0227 | 0.4366 | 0.3103 |
| Morocco     | 61399   | NA           | NA      | NA     | NA              | NA     | NA     | NA     |
| Mozambique  | 3821    | 8769.4296    | 4.7192  | 0.0336 | NA              | NA     | NA     | 0.0722 |
| Namibia     | 7365    | 19752.6493   | 4.6521  | 0.0557 | NA              | NA     | NA     | 0.0369 |
| Nepal       | 38561   | 18780.2065   | 6.6411  | 0.1098 | 30689.663<br>6  | 4.1320 | 0.1019 | 0.0727 |
| Netherlands | 70071   | 47727.8050   | 3.8502  | 0.0920 | 21992.489<br>1  | 4.7197 | 0.1103 | 0.0793 |
| New Zealand | 1387    | 1117.4873    | 3.3022  | 0.2346 | NA              | NA     | NA     | 0.0959 |
| Nicaragua   | 4494    | 4483.4442    | 2.0435  | 0.0494 | NA              | NA     | NA     | 0.2250 |
| Niger       | 1176    | 56771.2201   | 4.7597  | 0.0449 | NA              | NA     | NA     | 0.0283 |
| Nigeria     | 53865   | 1555.4972    | 3.4741  | 0.1320 | 12680.036<br>9  | 3.8436 | 0.0549 | 0.0639 |
| Norway      | 10543   | 8479.5156    | 3.2578  | 0.1023 | 1761.7727       | 4.5090 | 0.1300 | 0.1522 |
| Oman        | 85544   | 89246.7641   | 6.5958  | 0.0616 | NA              | NA     | NA     | 0.0878 |
| Pakistan    | 295849  | 294439.8470  | 6.1567  | 0.0648 | NA              | NA     | NA     | 0.0493 |
| Palestine   | 29063   | 30248.6952   | 9.1084  | 0.0669 | NA              | NA     | NA     | 0.1613 |
| Panama      | 92065   | 117314.2780  | 4.9029  | 0.0364 | NA              | NA     | NA     | 0.0192 |
| Paraguay    | 17195   | NA           | NA      | NA     | NA              | NA     | NA     | NA     |

|                             |         |              |        |        |                  |        |        |        |
|-----------------------------|---------|--------------|--------|--------|------------------|--------|--------|--------|
| Peru                        | 647166  | 314970.4317  | 5.4482 | 0.0677 | 452678.99<br>16  | 3.2689 | 0.0727 | 0.0345 |
| Philippines                 | 217396  | 7709617.3043 | 8.6352 | 0.0295 | NA               | NA     | NA     | 0.1425 |
| Poland                      | 66870   | 37617.3841   | 3.2568 | 0.0471 | 37253.020<br>1   | 3.3748 | 0.0810 | 0.0678 |
| Portugal                    | 57929   | 27725.1980   | 3.9706 | 0.1185 | 24053.684<br>5   | 2.7848 | 0.0663 | 0.0624 |
| Puerto Rico                 | 32848   | 13037.7613   | 3.5594 | 0.0398 | 30810.272<br>9   | 3.9246 | 0.0771 | 0.0734 |
| Qatar                       | 118575  | 114154.2700  | 5.3173 | 0.0617 | NA               | NA     | NA     | 0.0291 |
| Romania                     | 86785   | 18736.0502   | 3.8730 | 0.0867 | 88299.966<br>8   | 4.3176 | 0.0575 | 0.0456 |
| Russia                      | 990326  | 944933.9504  | 4.0525 | 0.0441 | NA               | NA     | NA     | 0.1218 |
| Rwanda                      | 4020    | 8246.7708    | 4.9188 | 0.0283 | NA               | NA     | NA     | 0.7079 |
| Saudi Arabia                | 314821  | 320470.6504  | 5.0217 | 0.0474 | NA               | NA     | NA     | 0.0383 |
| Senegal                     | 13556   | 14520.3585   | 3.8986 | 0.0356 | NA               | NA     | NA     | 0.0869 |
| Serbia                      | 31365   | 10889.8012   | 4.6659 | 0.1250 | 20573.998<br>4   | 4.3379 | 0.0792 | 0.0281 |
| Singapore                   | 56771   | 43064.6037   | 6.9493 | 0.0763 | 12182.686<br>4   | 3.2260 | 0.1319 | 0.1479 |
| Slovakia                    | 3876    | 1502.3267    | 3.6374 | 0.1185 | 5628.8348        | 4.9385 | 0.0493 | 0.1520 |
| South Africa                | 625056  | 657770.4040  | 8.8676 | 0.0697 | NA               | NA     | NA     | 0.0165 |
| South Korea                 | 19947   | 10142.9519   | 3.1675 | 0.1737 | NA               | NA     | NA     | 0.3329 |
| South Sudan                 | 2519    | 2034.9156    | 3.9351 | 0.1254 | 357.7103         | 3.2445 | 0.1936 | 0.1939 |
| Spain                       | 463943  | 232080.0683  | 4.5993 | 0.1206 | 519213.34<br>89  | 5.8299 | 0.0646 | 0.1405 |
| Sudan                       | 13189   | 11334.2564   | 3.7113 | 0.0706 | 1447.2698        | 3.2426 | 0.2058 | 0.0992 |
| Suriname                    | 4009    | 6441.6655    | 4.3439 | 0.0529 | NA               | NA     | NA     | 0.0399 |
| Sweden                      | 84233   | 88955.5267   | 3.6997 | 0.0388 | 9247.8436        | 2.9268 | 0.1461 | 0.0963 |
| Switzerland                 | 41906   | 30089.0565   | 4.3551 | 0.1421 | 16542.980<br>8   | 4.3765 | 0.0534 | 0.0856 |
| Syria                       | 2703    | NA           | NA     | NA     | NA               | NA     | NA     | NA     |
| Tajikistan                  | 8550    | 7809.6500    | 2.2830 | 0.0596 | NA               | NA     | NA     | 0.2877 |
| Thailand                    | 3412    | 3129.1627    | 4.0437 | 0.1363 | NA               | NA     | NA     | 0.4098 |
| Trinidad and Tobago         | 1683    | NA           | NA     | NA     | NA               | NA     | NA     | NA     |
| Tunisia                     | 3685    | 994.4882     | 2.9592 | 0.1432 | NA               | NA     | NA     | 0.0916 |
| Turkey                      | 268546  | 198451.0508  | 2.9024 | 0.0638 | 50313.213<br>0   | 2.8069 | 0.1128 | 0.2541 |
| Uganda                      | 3044    | 1077.7651    | 5.6711 | 0.0898 | NA               | NA     | NA     | 0.2300 |
| Ukraine                     | 119074  | 202167.8426  | 3.9370 | 0.0252 | NA               | NA     | NA     | 0.1084 |
| United Arab Emir-<br>ates   | 69690   | 60073.5725   | 4.2690 | 0.0514 | 8839.0863        | 3.0765 | 0.1818 | 0.0853 |
| United Kingdom              | 334467  | 277495.8516  | 4.2224 | 0.0742 | 56759.830<br>0   | 2.9675 | 0.0747 | 0.0735 |
| United States of<br>America | 5997163 | 1683559.9636 | 5.2804 | 0.0846 | 4524204.7<br>065 | 3.5090 | 0.0614 | 0.0656 |
| Uzbekistan                  | 41651   | 71893.9253   | 5.8737 | 0.0390 | NA               | NA     | NA     | 0.0910 |
| Venezuela                   | 45868   | 101429.9411  | 7.4504 | 0.0446 | NA               | NA     | NA     | 0.1045 |
| Zambia                      | 12025   | 25961.2086   | 6.1123 | 0.0441 | NA               | NA     | NA     | 0.2871 |
| Zimbabwe                    | 6412    | 7030.4941    | 6.1792 | 0.0805 | NA               | NA     | NA     | 0.1369 |



**Table S3. Parameter values estimated from the segmented Gompertz model.**  $\alpha$  is the maximum number of predicted cumulative confirmed cases,  $\beta$  is the time when we start to see a rise in the number of confirmed cases,  $\gamma$  is the increase rate of number of confirmed cases. NA indicates no values returned due to failure of the model to converge.

| Segmented Gompertz Model               |                          |              |         |          |             |         |          |        |
|----------------------------------------|--------------------------|--------------|---------|----------|-------------|---------|----------|--------|
| Country                                | Maximum Cumulative cases | 1st Segment  |         |          | 2nd Segment |         |          | MSSE   |
|                                        |                          | $\alpha$     | $\beta$ | $\gamma$ | $\alpha$    | $\beta$ | $\gamma$ |        |
| Afghanistan                            | 38162                    | 38658.2222   | 25.0726 | 0.0471   | NA          | NA      | NA       | 0.0609 |
| Albania                                | 9380                     | NA           | NA      | NA       | NA          | NA      | NA       | NA     |
| Algeria                                | 44146                    | 18438.6969   | 5.2016  | 0.0253   | 44055.5472  | 5.8284  | 0.0364   | 0.0254 |
| Angola                                 | 2624                     | 8050.2783    | 8.3479  | 0.0185   | NA          | NA      | NA       | 0.0974 |
| Argentina                              | 401226                   | 4066522.7272 | 12.0418 | 0.0096   | NA          | NA      | NA       | 0.0173 |
| Armenia                                | 43750                    | 49098.8425   | 16.6368 | 0.0300   | NA          | NA      | NA       | 0.0340 |
| Aruba                                  | 1997                     | NA           | NA      | NA       | NA          | NA      | NA       | NA     |
| Australia                              | 25670                    | 6951.4440    | 25.7079 | 0.1324   | 23230.6065  | 15.4190 | 0.0505   | 0.0557 |
| Austria                                | 27218                    | 16155.0090   | 11.0045 | 0.1050   | 52770.0104  | 5.5194  | 0.0142   | 0.0947 |
| Azerbaijan                             | 36309                    | 57315.1635   | 11.6912 | 0.0219   | 3083.2804   | 4.2461  | 0.1430   | 0.1164 |
| Bahamas                                | 2167                     | 5701.9544    | 75.2460 | 0.0308   | NA          | NA      | NA       | 0.1588 |
| Bahrain                                | 51574                    | 66098.9116   | 11.4035 | 0.0207   | NA          | NA      | NA       | 0.0264 |
| Bangladesh                             | 310822                   | 382000.1473  | 9.6930  | 0.0240   | NA          | NA      | NA       | 0.0181 |
| Belarus                                | 71687                    | 71550.0996   | 10.0480 | 0.0389   | 5377.0525   | 4.1283  | 0.0834   | 0.0226 |
| Belgium                                | 85442                    | 60644.2641   | 9.9910  | 0.0647   | 36686.9561  | 7.1235  | 0.0421   | 0.0271 |
| Bolivia                                | 115968                   | 227156.0219  | 11.1086 | 0.0177   | NA          | NA      | NA       | 0.0234 |
| Bosnia and<br>Herze-<br>govina         | 19789                    | NA           | NA      | NA       | NA          | NA      | NA       | NA     |
| Brazil                                 | 3862311                  | 7198325.5242 | 10.3171 | 0.0160   | NA          | NA      | NA       | 0.0094 |
| Bulgaria                               | 16190                    | 4232.8425    | 4.5593  | 0.0290   | 17992.4458  | 6.4959  | 0.0330   | 0.0421 |
| Cameroon                               | 19142                    | 108707.0966  | 6.8335  | 0.0119   | 6516.6774   | 3.3445  | 0.0703   | 0.2447 |
| Canada                                 | 127940                   | 109946.6392  | 8.5150  | 0.0420   | 27876.8064  | 3.6582  | 0.0460   | 0.0235 |
| Cape Verde                             | 3852                     | 833.7525     | 4.0029  | 0.0399   | 5158.9832   | 4.8344  | 0.0235   | 0.0685 |
| Central Af-<br>rican Re-<br>public     | 4700                     | 4833.5213    | 12.9590 | 0.0555   | NA          | NA      | NA       | 0.0936 |
| Chile                                  | 409974                   | 415001.2049  | 29.4866 | 0.0376   | NA          | NA      | NA       | 0.1943 |
| China                                  | 89868                    | 84708.4919   | 21.1560 | 0.1299   | NA          | NA      | NA       | 0.5822 |
| Colombia                               | 607938                   | 7084799.4030 | 11.9798 | 0.0094   | NA          | NA      | NA       | 0.0533 |
| Congo                                  | 3979                     | 6520.0095    | 8.7962  | 0.0208   | NA          | NA      | NA       | 0.3839 |
| Costa Rica                             | 39699                    | 136895.5602  | 22.2936 | 0.0170   | NA          | NA      | NA       | 0.0329 |
| Cote d' Ivoire                         | 17948                    | 26535.0293   | 10.5070 | 0.0226   | 1163.2906   | 4.0580  | 0.1612   | 0.2006 |
| Croatia                                | 10123                    | 2224.6337    | 5.2293  | 0.0869   | 35557.9695  | 6.2427  | 0.0144   | 0.2303 |
| Cuba                                   | 3973                     | 2044.3069    | 5.4702  | 0.0707   | 464.3771    | 4.3821  | 0.1089   | 0.0218 |
| Czechia                                | 24367                    | 8766.2736    | 6.1152  | 0.0727   | 47008.7555  | 5.0086  | 0.0155   | 0.0728 |
| Democratic<br>Republic of<br>the Congo | 10044                    | 10736.4218   | 11.8301 | 0.0324   | 274.5472    | 4.6493  | 0.2899   | 0.0508 |
| Denmark                                | 16700                    | 12688.0788   | 4.8168  | 0.0481   | 8468.0207   | 6.0552  | 0.0374   | 0.0926 |
| Djibouti                               | 5385                     | 1128.0306    | 13.5460 | 0.1842   | 4055.6841   | 8.8338  | 0.0856   | 0.2978 |
| Dominican<br>Republic                  | 94241                    | 494048.5687  | 6.4591  | 0.0086   | NA          | NA      | NA       | 0.1698 |
| Ecuador                                | 117639                   | 48988.1455   | 13.5407 | 0.0597   | 118443.9190 | 4.0637  | 0.0228   | 0.2421 |
| Egypt                                  | 98727                    | 112100.7245  | 27.5626 | 0.0341   | 3048.1640   | 3.8200  | 0.1437   | 0.0843 |
| El Salvador                            | 25729                    | 84767.4806   | 8.6124  | 0.0134   | NA          | NA      | NA       | 0.1306 |
| Equatorial<br>Guinea                   | 4941                     | 2947.6606    | 4.7078  | 0.0329   | 2242.6633   | 11.3615 | 0.1124   | 0.6882 |
| Estonia                                | 2373                     | 1898.7892    | 4.0019  | 0.0674   | 2204.7769   | 6.8346  | 0.0199   | 0.1693 |

|                  |         |               |           |        |              |         |        |        |
|------------------|---------|---------------|-----------|--------|--------------|---------|--------|--------|
| Eswatini         | 4561    | 19034.0804    | 7.6768    | 0.0133 | NA           | NA      | NA     | 0.1214 |
| Ethiopia         | 51122   | NA            | NA        | NA     | NA           | NA      | NA     | NA     |
| Finland          | 8077    | 7383.6402     | 5.3518    | 0.0485 | 2396.7520    | 5.6497  | 0.0314 | 0.0416 |
| France           | 278709  | 151791.8661   | 12.8923   | 0.0683 | NA           | NA      | NA     | 0.0523 |
| Gabon            | 8505    | 6670.3765     | 8.3496    | 0.0416 | 3268.2183    | 4.3985  | 0.1016 | 0.0552 |
| Gambia           | 2963    | 4460.8609     | 16.3888   | 0.0590 | NA           | NA      | NA     | 0.0822 |
| Georgia          | 1487    | 180590.9806   | 14.3623   | 0.0745 | 1399965.8160 | 6.0875  | 0.0076 | 0.0475 |
| Germany          | 242381  | 43428.0235    | 8.2229    | 0.0245 | 50878.8766   | 5.1497  | 0.0303 | 0.1860 |
| Greece           | 10134   | 2850.2120     | 5.6666    | 0.0705 | NA           | NA      | NA     | 0.0592 |
| Guam             | 1347    | NA            | NA        | NA     | NA           | NA      | NA     | NA     |
| Guatemala        | 73912   | 120849.4230   | 12.8995   | 0.0215 | NA           | NA      | NA     | 0.0557 |
| Guinea           | 9371    | 6276.1720     | 4.8603    | 0.0356 | 5896.6630    | 3.6876  | 0.0353 | 0.0422 |
| Haiti            | 8209    | 7919.9844     | 14.2064   | 0.0522 | NA           | NA      | NA     | 0.0596 |
| Honduras         | 60174   | 94977.9591    | 13.7684   | 0.0214 | 16635.0074   | 4.0325  | 0.1127 | 0.0782 |
| Hungary          | 5961    | 4158.2722     | 6.0539    | 0.0554 | 90891.8764   | 7.8593  | 0.0089 | 0.2417 |
| Iceland          | 2105    | 1815.9673     | 11.4017   | 0.1168 | 6308.7422    | 11.2834 | 0.0124 | 0.2764 |
| India            | 3621245 | 87187036.6787 | 11.8631   | 0.0075 | NA           | NA      | NA     | 0.0204 |
| Indonesia        | 172053  | 798318.0620   | 7.0186    | 0.0087 | NA           | NA      | NA     | 0.0084 |
| Iran             | 373570  | 118567.0986   | 7.9497    | 0.0523 | 348087.8281  | 3.8623  | 0.0216 | 0.0349 |
| Iraq             | 231177  | 565000.6425   | 17.3186   | 0.0163 | NA           | NA      | NA     | 0.0389 |
| Ireland          | 28760   | 26103.4687    | 11.1085   | 0.0707 | NA           | NA      | NA     | 0.1597 |
| Honduras         | 60174   | 17138.7762    | 10.4599   | 0.0872 | 125660.9635  | 13.5198 | 0.0359 | 0.0430 |
| Italy            | 268366  | 239477.4394   | 9.4656    | 0.0574 | NA           | NA      | NA     | 0.0219 |
| Jamaica          | 2357    | NA            | NA        | NA     | NA           | NA      | NA     | NA     |
| Japan            | 67865   | 17531.5024    | 89.4251   | 0.0760 | 98622.3568   | 15.6933 | 0.0325 | 0.0955 |
| Kazakhstan       | 130673  | NA            | NA        | NA     | NA           | NA      | NA     | NA     |
| Kenya            | 34057   | 99124.7710    | 13.0280   | 0.0165 | NA           | NA      | NA     | 0.1973 |
| Kosovo           | 13334   | 79700.2167    | 9.2221    | 0.0103 | NA           | NA      | NA     | 0.2460 |
| Kuwait           | 84636   | 82441.1292    | 14.3643   | 0.0264 | 20197.2297   | 3.6386  | 0.0935 | 0.0725 |
| Kyrgyzstan       | 43898   | 45547.7268    | 5355.3572 | 0.0766 | NA           | NA      | NA     | 1.2727 |
| Lebanon          | 16870   | NA            | NA        | NA     | NA           | NA      | NA     | NA     |
| Luxem-<br>bourg  | 8010    | NA            | NA        | NA     | NA           | NA      | NA     | NA     |
| Madagascar       | 14843   | 3911.1573     | 5.0182    | 0.1050 | 4326.7213    | 15.6462 | 0.0556 | 0.0534 |
| Malawi           | 5536    | 18617.7675    | 91.9470   | 0.0405 | NA           | NA      | NA     | 0.2242 |
| Malaysia         | 9334    | 560.8286      | 29.4977   | 0.1370 | 5847.5530    | 5.6631  | 0.0448 | 0.0626 |
| Maldives         | 7667    | 6865.9962     | 7.4158    | 0.0678 | 2302.4141    | 2.8881  | 0.0620 | 0.2145 |
| Luxem-<br>bourg  | 8010    | 2481.8562     | 4.3299    | 0.0516 | 13064.4175   | 6.1831  | 0.0290 | 0.0949 |
| Mauritania       | 7022    | 6952.5768     | 7.9523    | 0.0559 | NA           | NA      | NA     | 0.1181 |
| Mexico           | 641442  | 1078940.7137  | 8.7075    | 0.0161 | NA           | NA      | NA     | 0.0054 |
| Moldova          | 36700   | 89476.8616    | 5.3770    | 0.0109 | 33783.2559   | 3.8986  | 0.0326 | 0.0632 |
| Montenegro       | 4790    | 7276.4251     | 58.9567   | 0.0315 | 764.5359     | 4.0296  | 0.1998 | 0.3762 |
| Morocco          | 61399   | NA            | NA        | NA     | NA           | NA      | NA     | NA     |
| Mozam-<br>bique  | 3821    | 87202.3592    | 7.5356    | 0.0066 | NA           | NA      | NA     | 0.0683 |
| Namibia          | 7365    | 333497.1922   | 7.8533    | 0.0098 | NA           | NA      | NA     | 0.0363 |
| Nepal            | 38561   | 23759.6419    | 21.5334   | 0.0521 | 114201.0768  | 5.9905  | 0.0269 | 0.1086 |
| Netherlands      | 70071   | 49107.7894    | 7.9913    | 0.0590 | 38774.5904   | 7.2102  | 0.0405 | 0.0432 |
| New Zea-<br>land | 1387    | 1127.1035     | 6.1202    | 0.1598 | NA           | NA      | NA     | 0.0097 |
| Nicaragua        | 4494    | 4915.0570     | 2.6343    | 0.0300 | NA           | NA      | NA     | 0.1603 |
| Niger            | 1176    | 73615.8370    | 8.6526    | 0.0208 | NA           | NA      | NA     | 0.0222 |
| Nigeria          | 53865   | 1874.5592     | 4.9774    | 0.0664 | 15364.7097   | 6.1098  | 0.0278 | 0.0358 |
| Norway           | 10543   | 8618.0392     | 5.7781    | 0.0680 | 2843.9925    | 6.8781  | 0.0507 | 0.0812 |
| Oman             | 85544   | 100763.2996   | 28.3321   | 0.0334 | NA           | NA      | NA     | 0.1751 |

|                                |         |               |         |        |              |        |        |        |
|--------------------------------|---------|---------------|---------|--------|--------------|--------|--------|--------|
| Pakistan                       | 295849  | 313983.3281   | 28.4530 | 0.0386 | NA           | NA     | NA     | 0.1366 |
| Palestine                      | 29063   | 42050.0663    | 59.6946 | 0.0299 | NA           | NA     | NA     | 0.0633 |
| Panama                         | 92065   | 260971.5242   | 7.2872  | 0.0116 | NA           | NA     | NA     | 0.0598 |
| Paraguay                       | 17195   | NA            | NA      | NA     | NA           | NA     | NA     | NA     |
| Peru                           | 647166  | 446214.4655   | 10.7987 | 0.0290 | 846683.9627  | 4.3642 | 0.0264 | 0.0321 |
| Philippines                    | 217396  | NA            | NA      | NA     | NA           | NA     | NA     | NA     |
| Poland                         | 66870   | 47514.4286    | 4.5190  | 0.0231 | 64104.7074   | 4.5054 | 0.0308 | 0.0361 |
| Portugal                       | 57929   | 29936.8951    | 7.6538  | 0.0699 | 29015.3918   | 3.6595 | 0.0343 | 0.0215 |
| Puerto Rico                    | 32848   | 65040.0602    | 5.4168  | 0.0096 | 50324.6920   | 5.5172 | 0.0301 | 0.0745 |
| Qatar                          | 118575  | 120095.6164   | 18.2530 | 0.0378 | NA           | NA     | NA     | 0.0333 |
| Romania                        | 86785   | 21563.1947    | 6.5107  | 0.0466 | 216103.4983  | 6.0951 | 0.0177 | 0.0318 |
| Russia                         | 990326  | 1057244.6747  | 7.5490  | 0.0247 | NA           | NA     | NA     | 0.0380 |
| Rwanda                         | 4020    | 160397.3892   | 8.3458  | 0.0048 | NA           | NA     | NA     | 0.6512 |
| Saudi Ara-<br>bia              | 314821  | 375527.3377   | 11.0682 | 0.0244 | NA           | NA     | NA     | 0.0589 |
| Senegal                        | 13556   | 19817.4519    | 5.8206  | 0.0161 | NA           | NA     | NA     | 0.0395 |
| Serbia                         | 31365   | 11544.5233    | 11.9676 | 0.0755 | 24299.8019   | 7.8757 | 0.0408 | 0.0301 |
| Singapore                      | 56771   | 46555.2356    | 44.9176 | 0.0451 | 13163.0862   | 4.8592 | 0.0772 | 0.0811 |
| Slovakia                       | 3876    | 1564.7214     | 6.4994  | 0.0733 | 74539.1570   | 8.0670 | 0.0091 | 0.1994 |
| South Af-<br>rica              | 625056  | 787210.6110   | 75.3165 | 0.0351 | NA           | NA     | NA     | 0.1231 |
| South Korea                    | 19947   | 10364.8855    | 5.4689  | 0.1147 | NA           | NA     | NA     | 0.1889 |
| South Su-<br>dan               | 2519    | 2147.1872     | 7.8644  | 0.0767 | 373.3645     | 5.1459 | 0.1199 | 0.2220 |
| Spain                          | 463943  | 237938.9846   | 13.3300 | 0.0784 | NA           | NA     | NA     | 0.0279 |
| Sudan                          | 13189   | 12339.0733    | 6.4342  | 0.0410 | 1902.2561    | 4.4326 | 0.0969 | 0.0612 |
| Suriname                       | 4009    | 29831.0627    | 6.3839  | 0.0128 | NA           | NA     | NA     | 0.0792 |
| Sweden                         | 84233   | 124252.7248   | 5.2176  | 0.0170 | 11067.5839   | 3.9308 | 0.0759 | 0.1109 |
| Switzerland                    | 41906   | 30687.3318    | 11.6364 | 0.0936 | 56221.8662   | 6.3637 | 0.0146 | 0.0491 |
| Syria                          | 2703    | NA            | NA      | NA     | NA           | NA     | NA     | NA     |
| Tajikistan                     | 8550    | 8127.3560     | 3.2065  | 0.0399 | NA           | NA     | NA     | 0.1665 |
| Thailand                       | 3412    | 3154.1186     | 9.3739  | 0.0897 | NA           | NA     | NA     | 0.2209 |
| Trinidad<br>and Tobago         | 1683    | NA            | NA      | NA     | NA           | NA     | NA     | NA     |
| Tunisia                        | 3685    | 1038.2063     | 4.5857  | 0.0915 | NA           | NA     | NA     | 0.0306 |
| Turkey                         | 268546  | 207933.5885   | 4.5240  | 0.0409 | 68974.9480   | 3.6475 | 0.0517 | 0.1452 |
| Uganda                         | 3044    | 1188.0377     | 19.7095 | 0.0514 | NA           | NA     | NA     | 0.1800 |
| Ukraine                        | 119074  | NA            | NA      | NA     | NA           | NA     | NA     | NA     |
| United<br>Arab Emir-<br>ates   | 69690   | 67678.3664    | 8.2582  | 0.0283 | 13578.4568   | 4.0506 | 0.0756 | 0.0398 |
| United<br>Kingdom              | 334467  | 291405.6852   | 9.4917  | 0.0458 | 99004.9490   | 3.9148 | 0.0286 | 0.0251 |
| United<br>States of<br>America | 5997163 | 1987478.8437  | 13.0915 | 0.0439 | 5952114.1576 | 4.8924 | 0.0284 | 0.0231 |
| Uzbekistan                     | 41651   | 788275.6765   | 9.1565  | 0.0072 | NA           | NA     | NA     | 0.2148 |
| Venezuela                      | 45868   | 3551978.5884  | 12.7690 | 0.0067 | NA           | NA     | NA     | 0.1627 |
| Zambia                         | 12025   | 31660320.7299 | 13.1480 | 0.0038 | NA           | NA     | NA     | 0.4628 |
| Zimbabwe                       | 6412    | 10189.0969    | 14.4420 | 0.0338 | NA           | NA     | NA     | 0.1983 |

### Supplementary Information Text

*Correlation analysis between the log-scaled parameters of the Growth curve models.*

Pearson correlation analysis for segmented Logistic and Gompertz models with the log-scaled of parameters are performed to determine the similarity between the parameters across the two models. Before performing the linear regression for the growth curve

model parameters and the national indicator variables, we interpret the correlation coefficients between model parameters and across segments. The points of focus are whether the parameter differences is retained in both Logistic and Gompertz models, and whether the parameters  $\alpha$ ,  $\beta$  and  $\gamma$  are correlated across segments.

For Logistic models (**Figure S3**), correlation analysis between parameters  $\alpha_1$  and  $\alpha_2$ , the maximum number of predicted cumulative confirmed cases in the 1<sup>st</sup> segment and 2<sup>nd</sup> segment respectively, have a strong positive correlation of 0.7. On the other hand, it was found that there was little correlation between the parameters  $\beta_1$  and  $\beta_2$  (-0.089) and in  $\gamma_1$  and  $\gamma_2$  (-0.32). While for Gompertz models (**Figure S4**), similar with Logistic model, two parameters  $a_1$  and  $a_2$ , the maximum number of predicted cumulative confirmed cases in the 1<sup>st</sup> segment and 2<sup>nd</sup> segment respectively, have a strong positive correlation (0.57) while there was no correlation between the coefficients  $\beta_1$  and  $\beta_2$  (0.15), also in  $\gamma_1$  and  $\gamma_2$  (-0.34).

The parameters  $\beta_2$  and  $\gamma_2$  have little correlation (-0.069 and 0.077 in the 1<sup>st</sup> segment, -0.27 and -0.31 in the 2<sup>nd</sup> segment for Logistic and Gompertz models) that is negligible when analyzing correlation coefficients. However, in the 1<sup>st</sup> segment, the correlation coefficients between parameters  $\alpha_1$  and  $\gamma_1$  for both Logistic (-0.52) and Gompertz (-0.66) models show that the relationship between the cumulative confirmed cases and the slope of the model has a negative correlation. It is same with the parameters  $\alpha_2$  and  $\gamma_2$  (-0.55 for Logistic model and -0.7 for Gompertz model) in the 2<sup>nd</sup> segment (**Figure S5 and S6**).

We can interpret the negative correlation between  $\alpha$  and  $\gamma$  with two aspects. The reason for this correlation is because of the internal structure of GCMs. Also, maybe social distancing policies that the countries implemented contributed to observed negative correlation. In other words, when COVID-19 had out broken at first in February and March in 2020, the policies was valid to reduce daily cases. The second one is the opposite case of the above reason. In the countries having had slight incline for COVID-19, they dealt with it relatively easily, so the level of social distancing policies was lower. It caused bad results that the cumulative cases had been continuously increasing. Therefore, this analysis confirms that the parameters have similar interpretation across models.

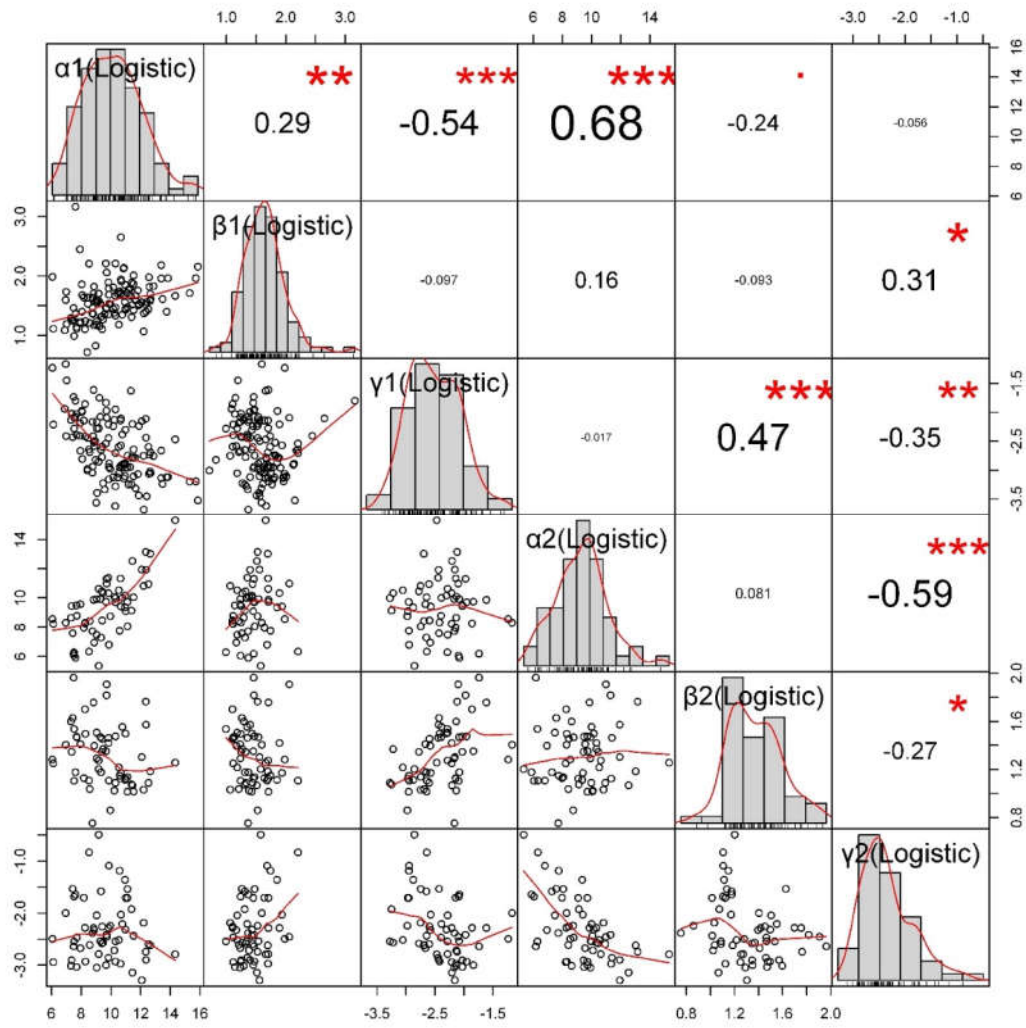

Figure S3. Comparison of Logistic Model (log-scaled) parameters  $\alpha$ ,  $\beta$ , and  $\gamma$  in the 1<sup>st</sup> and 2<sup>nd</sup> segments.

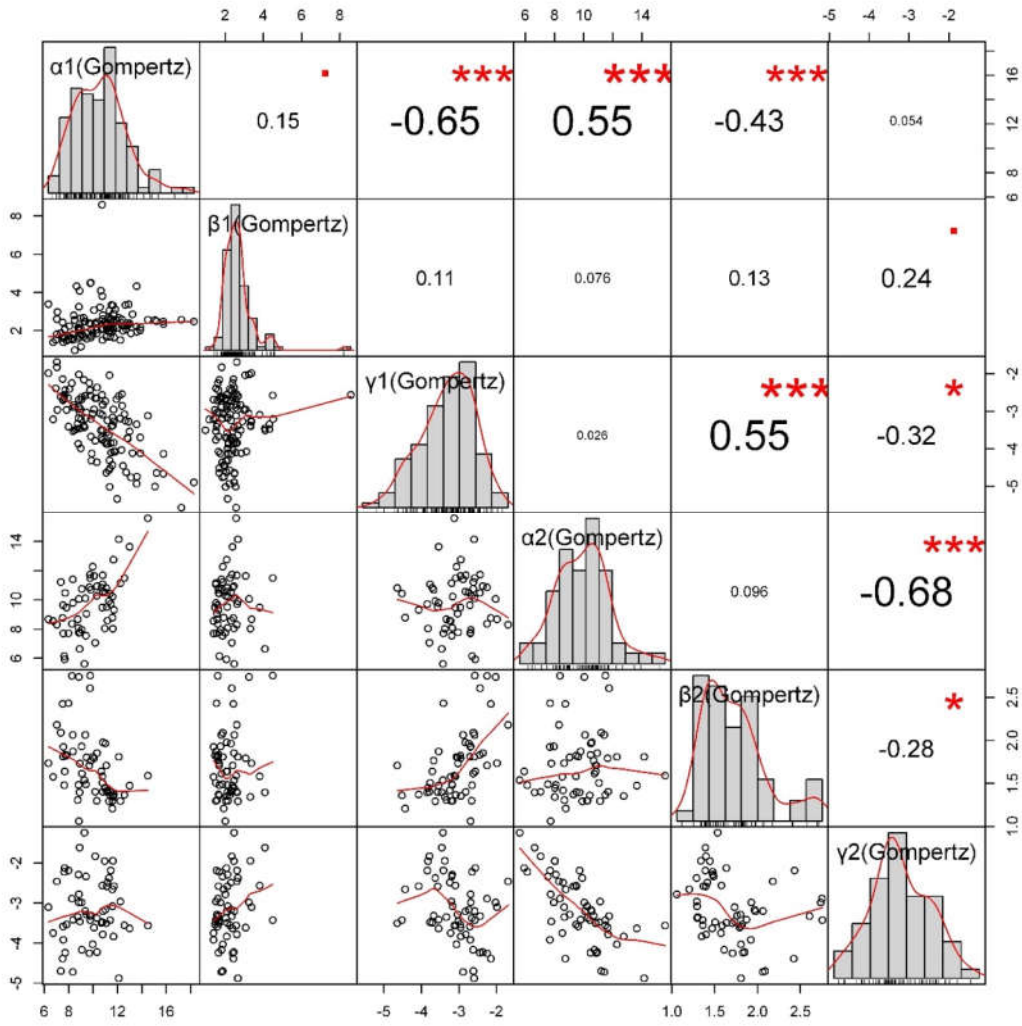

Figure S4. Comparison of Gompertz Model (log-scaled) parameters  $\alpha$ ,  $\beta$ , and  $\gamma$  in the 1st and 2nd segments.

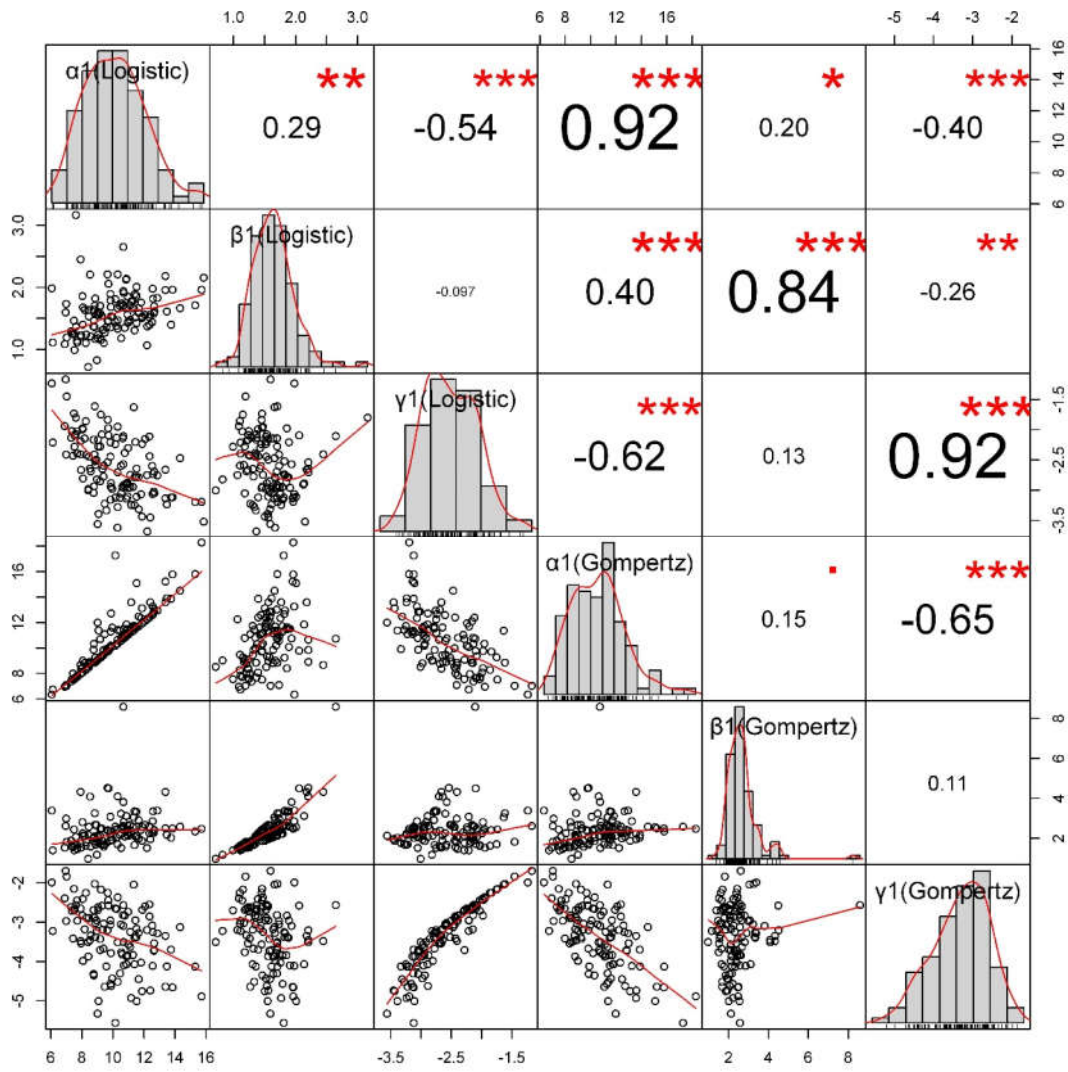

**Figure S5.** Comparison of Logistic and Gompertz Model (log-scaled) parameters  $\alpha$ ,  $\beta$ , and  $\gamma$  in the 1st segment.

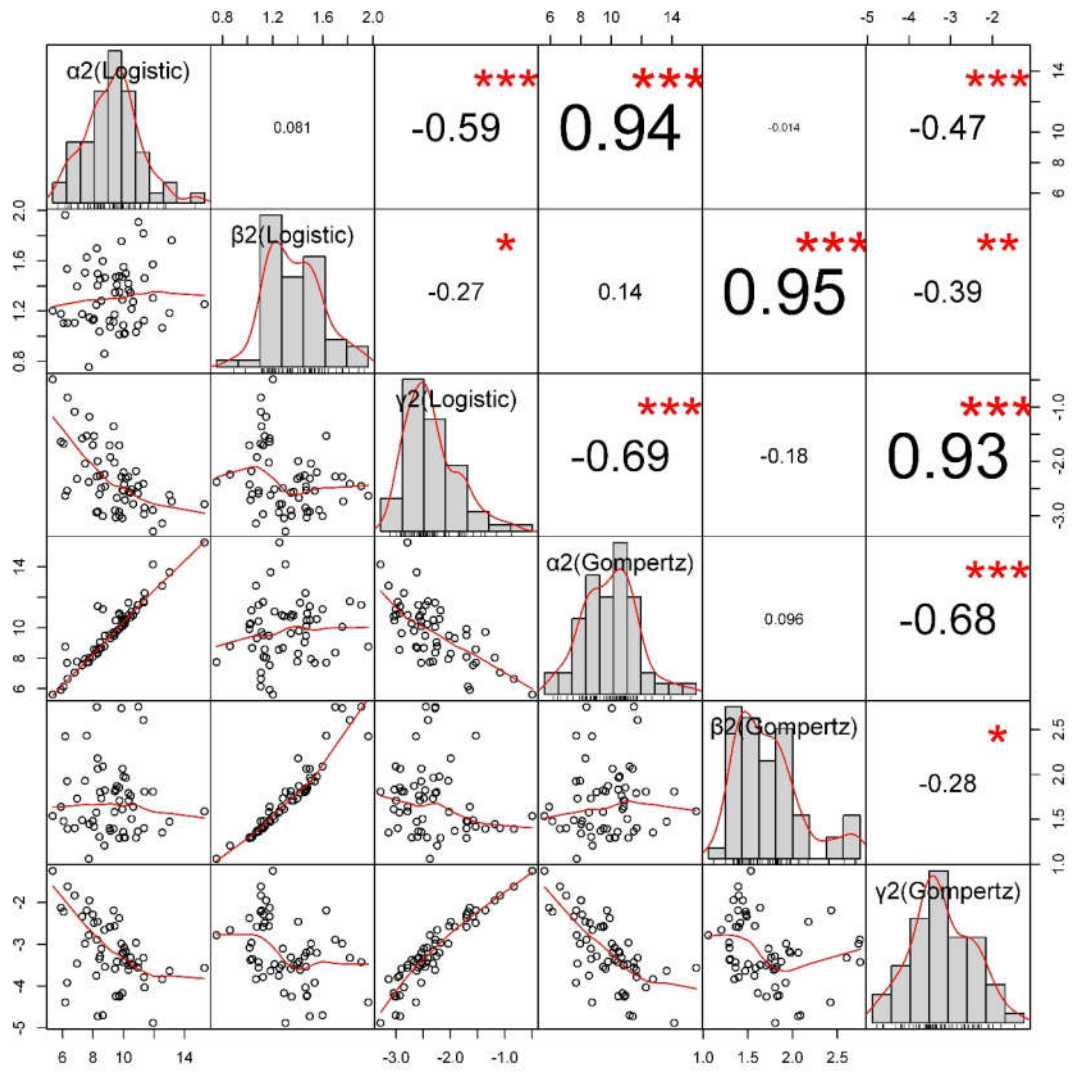

**Figure S6.** Comparison of Logistic and Gompertz Model (log-scaled) parameters  $\alpha$ ,  $\beta$ , and  $\gamma$  in the 2nd segment.



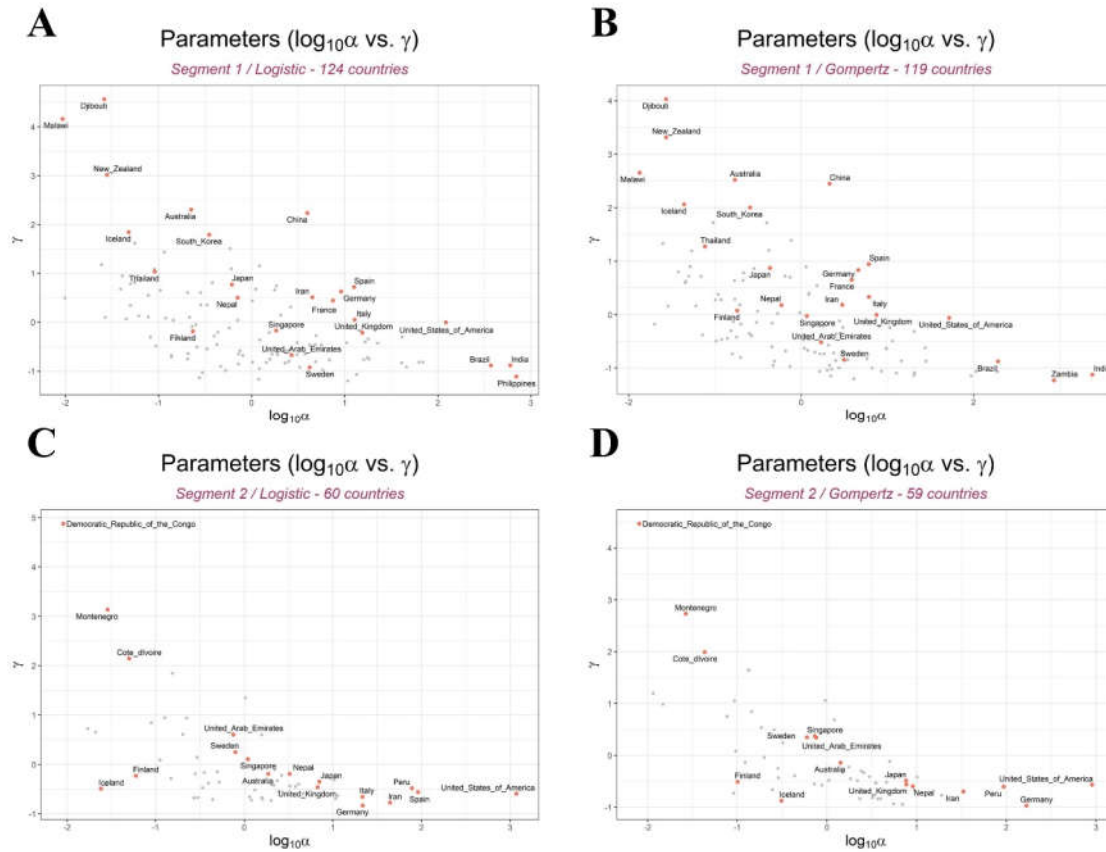

**Figure S7.** Variation of log10 maximum predicted cumulative cases ( $\alpha$ ) and rate of spread of COVID-19 among countries ( $\gamma$ ).

**Table S4.** A. Results from the regression analysis of parameters of growth curve models and national factors for the 1<sup>st</sup> segment. The p-values are in the brackets.

| Results of Linear regression of parameters of growth curve models and national factors |                        |                         |                        |                        |
|----------------------------------------------------------------------------------------|------------------------|-------------------------|------------------------|------------------------|
| Sample size                                                                            | Factor\Parameter       | 1 <sup>st</sup> Segment |                        |                        |
|                                                                                        |                        | Logistic                | Gompertz               |                        |
| 113                                                                                    | Child Vaccination rate | $\alpha$                | -162866.78<br>(0.1007) | -87309.168<br>(0.9204) |
|                                                                                        |                        | $\beta$                 | -0.2525<br>(0.099)     | -1.7217<br>(0.2962)    |
|                                                                                        |                        | $\gamma$                | 0.0092<br>(0.0474)     | 0.0063<br>(0.0646)     |
| 81                                                                                     | Malnutrition rate      | $\alpha$                | 148742.297<br>(0.2794) | 1106109.04<br>(0.3232) |
|                                                                                        |                        | $\beta$                 | 0.6544<br>(8.18E-05)   | 4.7293<br>(0.0103)     |
|                                                                                        |                        | $\gamma$                | -0.0135<br>(0.0046)    | -0.01125<br>(0.0013)   |
| 114                                                                                    | Migration rate         | $\alpha$                | -24299.073<br>(0.8057) | -198330.74<br>(0.8031) |
|                                                                                        |                        | $\beta$                 | 0.016<br>(0.9168)      | 0.9332<br>(0.5355)     |
|                                                                                        |                        | $\gamma$                | 0.0055<br>(0.2363)     | 0.0054<br>(0.0806)     |

|     |                                 |          |                        |                        |
|-----|---------------------------------|----------|------------------------|------------------------|
| 110 | Proportion of urban population  | $\alpha$ | -76419.969<br>(0.4555) | -1091047.7<br>(0.1873) |
|     |                                 | $\beta$  | -0.1491<br>(0.331)     | 0.0504<br>(0.9734)     |
|     |                                 | $\gamma$ | 0.0043<br>(0.3689)     | 0.0048<br>(0.1402)     |
| 21  | Public Social Welfare (2018)    | $\alpha$ | 30467.2057<br>(0.062)  | 32787.2884<br>(0.0529) |
|     |                                 | $\beta$  | 0.02383<br>(0.8547)    | 0.0074<br>(0.9919)     |
|     |                                 | $\gamma$ | -0.0133<br>(0.1745)    | -0.0092<br>(0.1876)    |
| 46  | National Competitiveness (2020) | $\alpha$ | 430277.632<br>(0.0667) | 1872125.73<br>(0.3459) |
|     |                                 | $\beta$  | 0.03348<br>(0.1389)    | 0.589<br>(0.8188)      |
|     |                                 | $\gamma$ | -0.0162<br>(0.0184)    | -0.0126<br>(0.0148)    |
| 89  | Temperature                     | $\alpha$ | 197487.26<br>(0.1151)  | 699067.536<br>(0.509)  |
|     |                                 | $\beta$  | 0.3798<br>(0.0165)     | 1.537<br>(0.3739)      |
|     |                                 | $\gamma$ | -0.0069<br>(0.2258)    | -0.0076<br>(0.051)     |
| 89  | Rain                            | $\alpha$ | 271748.495<br>(0.0284) | -20108.621<br>(0.9856) |
|     |                                 | $\beta$  | 0.339<br>(0.0321)      | 2.1164<br>(0.2413)     |
|     |                                 | $\gamma$ | -0.003<br>(0.6056)     | -0.003<br>(0.465)      |
| 24  | Pharmacy Sales (2018)           | $\alpha$ | 27315.7182<br>(0.2034) | 27408.8334<br>(0.2288) |
|     |                                 | $\beta$  | 0.7456<br>(0.0004)     | 12.2806<br>(0.0001)    |
|     |                                 | $\gamma$ | -0.0033<br>(0.7381)    | -0.0028<br>(0.6785)    |
| 89  | Exportation (2016)              | $\alpha$ | -185522.7<br>(0.1413)  | -1013900.6<br>(0.322)  |
|     |                                 | $\beta$  | -0.337587<br>(0.0467)  | -0.9287<br>(0.5576)    |
|     |                                 | $\gamma$ | 0.0064<br>(0.1579)     | 0.0068<br>(0.0377)     |
| 89  | Importation (2016)              | $\alpha$ | -93249.215<br>(0.4609) | -1272023.9<br>(0.219)  |
|     |                                 | $\beta$  | -0.4066<br>(0.0158)    | -2.9847<br>(0.0602)    |
|     |                                 | $\gamma$ | -0.0013<br>(0.7728)    | 0.0016<br>(0.626)      |
| 113 | Total GDP (2018)                | $\alpha$ | -21693.095<br>(0.8283) | -88251.311<br>(0.9139) |
|     |                                 | $\beta$  | 0.0277<br>(0.8578)     | -0.501<br>(0.7455)     |
|     |                                 | $\gamma$ | -0.0018<br>(0.708)     | 0.0007<br>(0.8238)     |
| 46  | Travel In (2017)                | $\alpha$ | 188185.298<br>(0.4312) | -1212922.4<br>(0.5466) |
|     |                                 | $\beta$  | 0.1928                 | -0.367                 |

|     |                          |          |                         |                          |
|-----|--------------------------|----------|-------------------------|--------------------------|
| 46  | Travel Out<br>(2017)     |          | (0.3844)                | (0.8885)                 |
|     |                          | $\gamma$ | 0.0058<br>(0.3608)      | 0.003<br>(0.497)         |
|     |                          | $\alpha$ | 166194.703<br>(0.4904)  | 986646.17<br>(0.6203)    |
|     |                          | $\beta$  | -0.0916<br>(0.6826)     | -0.6687<br>(0.7962)      |
| 114 | Aging Index<br>(2020)    | $\gamma$ | -0.0126<br>(0.0422)     | -0.0088<br>(0.04)        |
|     |                          | $\alpha$ | -87431.181<br>(0.3755)  | -529763.62<br>(0.5089)   |
|     |                          | $\beta$  | -0.5072<br>(0.0007)     | 0.0891<br>(0.9533)       |
| 112 | GDP per Capita<br>(2019) | $\gamma$ | 0.0119<br>(0.0094)      | 0.0121<br>6.83E-05)      |
|     |                          | $\alpha$ | -3.8816<br>(0.3797)     | -28.9139<br>(0.4185)     |
|     |                          | $\beta$  | -1.49E-05<br>(0.0278)   | 4.27E-06<br>(0.9497)     |
| 114 | Birth Rate<br>(2020)     | $\gamma$ | 6.36E-07<br>(0.0018)    | 5.86E-07<br>(1.38E-05)   |
|     |                          | $\alpha$ | -71328.528<br>(0.471)   | -301881.37<br>(0.7092)   |
|     |                          | $\beta$  | 0.2595<br>(0.0886)      | 0.323<br>(0.8332)        |
| 112 | Population Density       | $\gamma$ | -0.0059<br>(0.2088)     | -0.0072<br>(0.0235)      |
|     |                          | $\alpha$ | 16491.3143<br>(0.9336)  | 324103.636<br>(0.8381)   |
|     |                          | $\beta$  | 0.3404<br>(0.2862)      | 5.7412<br>(0.0636)       |
| 114 | Population               | $\gamma$ | -0.0026<br>(0.7878)     | -0.0006<br>(0.9235)      |
|     |                          | $\alpha$ | 144085.33<br>(5.13E-08) | 30147994.4<br>(4.07E-48) |
|     |                          | $\beta$  | 0.565<br>(0.2136)       | 0.8402<br>(0.8906)       |
| 118 | Median Age               | $\gamma$ | 0.0053<br>(0.6978)      | -0.0218<br>(0.082)       |
|     |                          | $\alpha$ | -40858.707<br>(0.6693)  | -293347.94<br>(0.7069)   |
|     |                          | $\beta$  | -0.5119<br>(0.0007)     | -1.0658<br>(0.4869)      |
| 117 | Aged 65 older            | $\gamma$ | 0.0103<br>(0.0233)      | 0.0112<br>(0.0002)       |
|     |                          | $\alpha$ | -69195.517<br>(0.4445)  | -444210.9<br>(0.5464)    |
|     |                          | $\beta$  | -0.5127<br>(0.0003)     | -0.6779347<br>(0.6398)   |
| 116 | Aged 70 older            | $\gamma$ | 0.01183<br>(0.0058)     | 0.01193<br>(3.24E-05)    |
|     |                          | $\alpha$ | -76963.694<br>(0.395)   | -490243.82<br>(0.5058)   |
|     |                          | $\beta$  | -0.5203<br>(0.0003)     | -0.7467<br>(0.6064)      |
|     |                          | $\gamma$ | 0.0114<br>(0.0076)      | 0.0118<br>(4.04E-05)     |

|     |                            |          |                        |                        |
|-----|----------------------------|----------|------------------------|------------------------|
| 117 | GDP per Capita             | $\alpha$ | -72600.451<br>(0.4153) | -578839.61<br>(0.4211) |
|     |                            | $\beta$  | -0.2912<br>(0.0411)    | -0.1546<br>(0.913)     |
|     |                            | $\gamma$ | 0.0074<br>(0.0823)     | 0.0083<br>(0.004)      |
| 83  | Extreme poverty            | $\alpha$ | -20797.551<br>(0.8536) | 621679.112<br>(0.6259) |
|     |                            | $\beta$  | 0.529<br>(0.0059)      | 5.5029<br>(0.0038)     |
|     |                            | $\gamma$ | 0.0013<br>(0.8401)     | -0.0022<br>(0.6292)    |
| 117 | Cardiovascular Death       | $\alpha$ | 35364.2112<br>(0.7108) | 151720.751<br>(0.8419) |
|     |                            | $\beta$  | 0.1663<br>(0.2642)     | 0.6245<br>(0.6763)     |
|     |                            | $\gamma$ | -0.0111<br>(0.0111)    | -0.0082<br>(0.0066)    |
| 117 | Diabetes prevalence        | $\alpha$ | 83615.5532<br>(0.4938) | 774400.837<br>(0.4333) |
|     |                            | $\beta$  | 0.2144<br>(0.277)      | 1.3588<br>(0.4846)     |
|     |                            | $\gamma$ | -0.0106<br>(0.0704)    | -0.0065<br>(0.1028)    |
| 95  | Female Smokers             | $\alpha$ | -80878.09<br>(0.4724)  | -843124.81<br>(0.3531) |
|     |                            | $\beta$  | -0.4377<br>(0.0044)    | -0.5464<br>(0.7142)    |
|     |                            | $\gamma$ | 0.0087<br>(0.0932)     | 0.0095<br>(0.0057)     |
| 93  | Male Smokers               | $\alpha$ | -65256.249<br>(0.6028) | -1056404.7<br>(0.3089) |
|     |                            | $\beta$  | -0.2687<br>(0.1202)    | -0.5804<br>(0.7338)    |
|     |                            | $\gamma$ | -0.0042<br>(0.468)     | -0.0004<br>(0.9236)    |
| 52  | Handwashing Facilities     | $\alpha$ | 204992.594<br>(0.325)  | 467873.18<br>(0.7988)  |
|     |                            | $\beta$  | 0.0679<br>(0.7639)     | -0.3347<br>(0.887)     |
|     |                            | $\gamma$ | -0.0066<br>(0.2888)    | -0.001<br>(0.7875)     |
| 105 | Hospital Beds per Thousand | $\alpha$ | -144568.79<br>(0.157)  | -947703.31<br>(0.2634) |
|     |                            | $\beta$  | -0.4366<br>(0.0052)    | 0.1302<br>(0.9351)     |
|     |                            | $\gamma$ | 0.0091<br>(0.0592)     | 0.009<br>(0.0061)      |
| 117 | Life Expectancy            | $\alpha$ | -26753.176<br>(0.7852) | -410006.48<br>(0.6054) |
|     |                            | $\beta$  | -0.3501<br>(0.0257)    | -0.5765<br>(0.7119)    |
|     |                            | $\gamma$ | 0.0096<br>(0.0401)     | 0.0102<br>(0.0012)     |
| 116 | Human Development Index    | $\alpha$ | -11471.282<br>(0.9091) | -452191.27<br>(0.5758) |
|     |                            | $\beta$  | -0.3341                | -0.6506                |

|  |          |          |          |
|--|----------|----------|----------|
|  |          | (0.0372) | (0.682)  |
|  | $\gamma$ | 0.0062   | 0.008    |
|  |          | (0.1997) | (0.0124) |

**Table S5. B.** Results from the regression analysis of parameters of growth curve models and national factors for the 2<sup>nd</sup> segment.

| Results of Linear regression of parameters of growth curve models and national factors |                                 |                         |                         |                         |
|----------------------------------------------------------------------------------------|---------------------------------|-------------------------|-------------------------|-------------------------|
| Sample size                                                                            | Factor\Parameter                | 2 <sup>nd</sup> Segment |                         |                         |
|                                                                                        |                                 | Logistic                | Gompertz                |                         |
| 113                                                                                    | Child Vaccination rate          | $\alpha$                | 22766.7187<br>(0.8298)  | 25628.9405<br>(0.8583)  |
|                                                                                        |                                 | $\beta$                 | 0.3063<br>(0.0962)      | 0.8224<br>(0.1163)      |
|                                                                                        |                                 | $\gamma$                | -0.0242<br>(0.1748)     | -0.0126<br>(0.1667)     |
| 81                                                                                     | Malnutrition rate               | $\alpha$                | -94847.6759<br>(0.6724) | -140310.632<br>(0.6461) |
|                                                                                        |                                 | $\beta$                 | -0.6739<br>(0.0723)     | -1.6175<br>(0.1359)     |
|                                                                                        |                                 | $\gamma$                | 0.0398<br>(0.1189)      | 0.0241<br>(0.0793)      |
| 114                                                                                    | Migration rate                  | $\alpha$                | 14085.0612<br>(0.8577)  | 36207.377<br>(0.7335)   |
|                                                                                        |                                 | $\beta$                 | 0.0952<br>(0.4904)      | 0.5389<br>(0.1661)      |
|                                                                                        |                                 | $\gamma$                | -0.0037<br>(0.7824)     | -0.0022<br>(0.7476)     |
| 110                                                                                    | Proportion of urban population  | $\alpha$                | 61101.784<br>(0.4972)   | 80948.5367<br>(0.499)   |
|                                                                                        |                                 | $\beta$                 | 0.2846<br>(0.0661)      | 0.9605<br>(0.0251)      |
|                                                                                        |                                 | $\gamma$                | -0.0015<br>(0.875)      | -0.0021<br>(0.6895)     |
| 21                                                                                     | Public Social Welfare (2018)    | $\alpha$                | 26122.6436<br>(0.4085)  | 58126.9043<br>(0.5323)  |
|                                                                                        |                                 | $\beta$                 | -0.348<br>(0.1826)      | -0.7516<br>(0.3451)     |
|                                                                                        |                                 | $\gamma$                | 0.0082<br>(0.2895)      | 0.0089<br>(0.0866)      |
| 46                                                                                     | National Competitiveness (2020) | $\alpha$                | 37310.1995<br>(0.1115)  | 36555.3449<br>(0.5367)  |
|                                                                                        |                                 | $\beta$                 | 0.0733<br>(0.7601)      | -0.1454<br>(0.8468)     |
|                                                                                        |                                 | $\gamma$                | -0.019<br>(0.0015)      | -0.0106<br>(0.0073)     |
| 89                                                                                     | Temperature                     | $\alpha$                | -21204.8904<br>(0.1513) | -36660.1652<br>(0.2723) |
|                                                                                        |                                 | $\beta$                 | -0.2805<br>(0.0689)     | -0.5364<br>(0.2332)     |
|                                                                                        |                                 | $\gamma$                | 0.0181<br>(0.0471)      | 0.0092<br>(0.0712)      |
| 89                                                                                     | Rain                            | $\alpha$                | -29052.6804<br>(0.081)  | -45051.5504<br>(0.2293) |
|                                                                                        |                                 | $\beta$                 | -0.2067<br>(0.2422)     | -0.2352<br>(0.6443)     |
|                                                                                        |                                 | $\gamma$                | 0.0145                  | 0.0069                  |

|     |                          |          |                         |                         |
|-----|--------------------------|----------|-------------------------|-------------------------|
|     |                          |          | (0.1653)                | (0.2324)                |
| 24  | Pharmacy Sales<br>(2018) | $\alpha$ | 43759.1067<br>(0.0733)  | 175788.3545<br>(0.0066) |
|     |                          | $\beta$  | 0.2278<br>(0.3962)      | 0.9545<br>(0.2885)      |
|     |                          | $\gamma$ | -0.006<br>(0.3619)      | -0.0016<br>(0.7302)     |
| 89  | Exportation<br>(2016)    | $\alpha$ | -106962.981<br>(0.212)  | -123682.78<br>(0.2838)  |
|     |                          | $\beta$  | -0.0232<br>(0.8736)     | -0.0896<br>(0.8287)     |
|     |                          | $\gamma$ | -0.0034<br>(0.6923)     | -0.0042<br>(0.3716)     |
| 89  | Importation<br>(2016)    | $\alpha$ | -193259.914<br>(0.0496) | -249104.359<br>(0.0621) |
|     |                          | $\beta$  | -0.1065<br>(0.529)      | -0.3803<br>(0.432)      |
|     |                          | $\gamma$ | -0.0037<br>(0.7123)     | -0.0063<br>(0.253)      |
| 113 | Total GDP<br>(2018)      | $\alpha$ | -70033.5848<br>(0.3859) | -76160.8968<br>(0.4931) |
|     |                          | $\beta$  | 0.094<br>(0.5079)       | 0.3571<br>(0.3822)      |
|     |                          | $\gamma$ | 0.0212<br>(0.1171)      | 0.0074<br>(0.2968)      |
| 46  | Travel In<br>(2017)      | $\alpha$ | 239740.8481<br>(0.1434) | 288980.8722<br>(0.1988) |
|     |                          | $\beta$  | 0.1355<br>(0.5094)      | 0.4249<br>(0.4799)      |
|     |                          | $\gamma$ | 0.0041<br>(0.5463)      | 0.0115<br>(0.0378)      |
| 46  | Travel Out<br>(2017)     | $\alpha$ | 204980.2878<br>(0.1889) | 345861.2615<br>(0.0987) |
|     |                          | $\beta$  | -0.2364<br>(0.2201)     | -0.5431<br>(0.3354)     |
|     |                          | $\gamma$ | -0.0004<br>(0.9499)     | -0.0029<br>(0.5968)     |
| 114 | Aging Index<br>(2020)    | $\alpha$ | 19947.5993<br>(0.7873)  | 50389.1524<br>(0.6239)  |
|     |                          | $\beta$  | 0.4186<br>(0.0007)      | 0.9256<br>(0.0121)      |
|     |                          | $\gamma$ | -0.0335<br>(0.0058)     | -0.0201<br>(0.0014)     |
| 112 | GDP per Capita<br>(2019) | $\alpha$ | 4.5781<br>(0.1479)      | 6.4778<br>(0.1279)      |
|     |                          | $\beta$  | 1.81E-05<br>(0.0006)    | 5.48E-05<br>(0.0002)    |
|     |                          | $\gamma$ | -9.13E-07<br>(0.0851)   | -5.27E-07<br>(0.0482)   |
| 114 | Birth Rate<br>(2020)     | $\alpha$ | -42729.883<br>(0.6268)  | -69051.085<br>(0.562)   |
|     |                          | $\beta$  | -0.3307<br>(0.0291)     | -0.674<br>(0.1215)      |
|     |                          | $\gamma$ | 0.0529<br>(0.0002)      | 0.0298<br>(2.38E-05)    |
| 112 | Population Density       | $\alpha$ | -35295.5568<br>(0.7692) | -47977.7212<br>(0.7685) |

|     |                      |          |                           |                           |
|-----|----------------------|----------|---------------------------|---------------------------|
|     |                      | $\beta$  | -0.057<br>(0.7877)        | -0.0689<br>(0.9088)       |
|     |                      | $\gamma$ | -0.0013<br>(0.9509)       | 0.0017<br>(0.869)         |
| 114 | Population           | $\alpha$ | 5718315.169<br>(9.58E-18) | 7460122.241<br>(1.33E-16) |
|     |                      | $\beta$  | -0.2749<br>(0.8613)       | -1.1855<br>(0.7871)       |
|     |                      | $\gamma$ | -0.0211<br>(0.8894)       | 0.0233<br>(0.7626)        |
| 118 | Median Age           | $\alpha$ | 36156.7095<br>(0.6451)    | 70324.4081<br>(0.5157)    |
|     |                      | $\beta$  | 0.3978<br>(0.0029)        | 0.8141<br>(0.0381)        |
|     |                      | $\gamma$ | -0.0394<br>(0.0022)       | -0.0239<br>(0.0003)       |
| 117 | Aged 65 older        | $\alpha$ | 35926.7119<br>(0.6034)    | 69689.3055<br>(0.4656)    |
|     |                      | $\beta$  | 0.4287<br>(0.0002)        | 0.9415<br>(0.0058)        |
|     |                      | $\gamma$ | -0.0324<br>(0.0045)       | -0.0199<br>(0.0007)       |
| 116 | Aged 70 older        | $\alpha$ | 33132.9659<br>(0.6302)    | 72072.3096<br>(0.4525)    |
|     |                      | $\beta$  | 0.4236<br>(0.0002)        | 0.0345<br>(0.0063)        |
|     |                      | $\gamma$ | -0.0318<br>(0.0051)       | -0.0198<br>(0.0008)       |
| 117 | GDP per Capita       | $\alpha$ | 81960.1179<br>(0.2553)    | 118502.3014<br>(0.2222)   |
|     |                      | $\beta$  | 0.2956<br>(0.0171)        | 0.9188<br>(0.0084)        |
|     |                      | $\gamma$ | -0.0197<br>(0.1047)       | -0.0114<br>(0.066)        |
| 83  | Extreme poverty      | $\alpha$ | -76235.7429<br>(0.5732)   | -97505.2165<br>(0.5896)   |
|     |                      | $\beta$  | -0.2832<br>(0.1732)       | -0.5634<br>(0.3393)       |
|     |                      | $\gamma$ | 0.0697<br>(0.0004)        | 0.0341<br>(0.0007)        |
| 117 | Cardiovascular Death | $\alpha$ | -76655.7457<br>(0.3483)   | -107128.767<br>(0.3143)   |
|     |                      | $\beta$  | -0.3666<br>(0.0091)       | -0.9235<br>(0.0164)       |
|     |                      | $\gamma$ | 0.0389<br>(0.0039)        | 0.0203<br>(0.0022)        |
| 117 | Diabetes prevalence  | $\alpha$ | 101926.4412<br>(0.3388)   | 112135.2213<br>(0.4086)   |
|     |                      | $\beta$  | -0.4435<br>(0.016)        | -1.069<br>(0.0298)        |
|     |                      | $\gamma$ | 0.0126<br>(0.49)          | 0.0128<br>(0.143)         |
| 95  | Female Smokers       | $\alpha$ | 24766.822<br>(0.7737)     | 54577.83<br>(0.6384)      |
|     |                      | $\beta$  | 0.2858<br>(0.0442)        | 0.5133<br>(0.2174)        |
|     |                      | $\gamma$ | -0.0025                   | -0.0056                   |

|     |                            |          |                         |                         |
|-----|----------------------------|----------|-------------------------|-------------------------|
|     |                            |          | (0.7954)                | (0.2825)                |
|     |                            | $\alpha$ | -89380.7136<br>(0.4668) | -109773.08<br>(0.4962)  |
| 93  | Male Smokers               | $\beta$  | -0.2111<br>(0.3013)     | -0.7053<br>(0.2217)     |
|     |                            | $\gamma$ | 0.0319<br>(0.0139)      | 0.0176<br>(0.0109)      |
|     |                            | $\alpha$ | 6579.7371<br>(0.2045)   | 7136.3648<br>(0.4027)   |
| 52  | Handwashing Facilities     | $\beta$  | 0.1928<br>(0.1339)      | 0.2958<br>(0.2666)      |
|     |                            | $\gamma$ | -0.041<br>(0.2382)      | -0.0172<br>(0.2845)     |
|     |                            | $\alpha$ | -41472.5662<br>(0.6042) | -13167.3972<br>(0.9029) |
| 105 | Hospital Beds per Thousand | $\beta$  | 0.3215<br>(0.0182)      | 0.9459<br>(0.0141)      |
|     |                            | $\gamma$ | -0.0047<br>(0.6166)     | -0.0065<br>(0.2003)     |
|     |                            | $\alpha$ | 50338.9611<br>(0.5402)  | 79085.338<br>(0.4844)   |
| 117 | Life Expectancy            | $\beta$  | 0.4937<br>(0.0003)      | 1.1331<br>(0.005)       |
|     |                            | $\gamma$ | -0.0447<br>(0.0008)     | -0.0265<br>(0.0001)     |
|     |                            | $\alpha$ | 85588.3356<br>(0.2845)  | 131772.9588<br>(0.2257) |
| 116 | Human Development Index    | $\beta$  | 0.4132<br>(0.0024)      | 0.9193<br>(0.0197)      |
|     |                            | $\gamma$ | -0.0401<br>(0.0022)     | -0.0238<br>(0.0004)     |

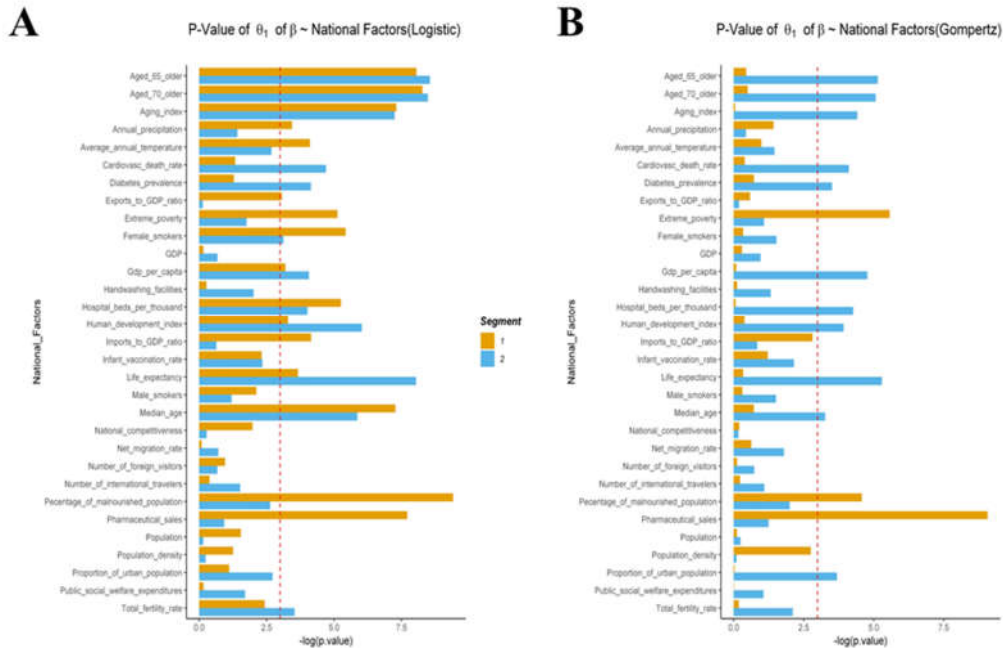

**Figure S8.** P-values of the relationship between national factors and  $\beta$ .



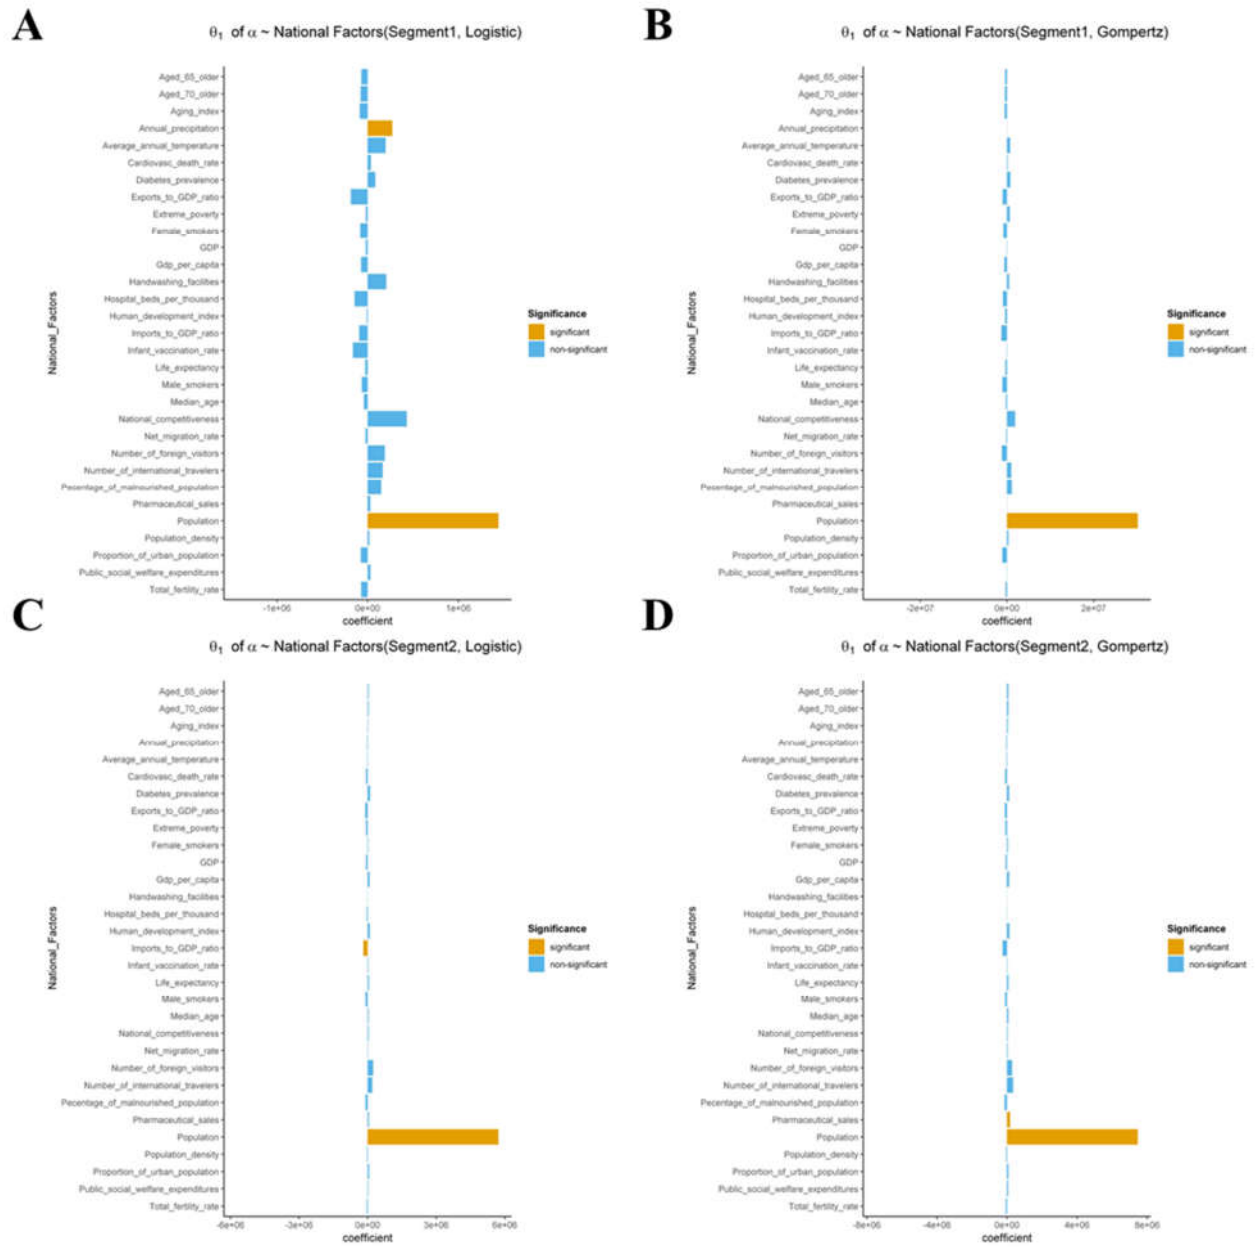

Figure S9. Coefficients of the relationship between national factors and  $\alpha$ .

**A** $\theta_1$  of  $\beta \sim$  National Factors(Segment1, Logistic)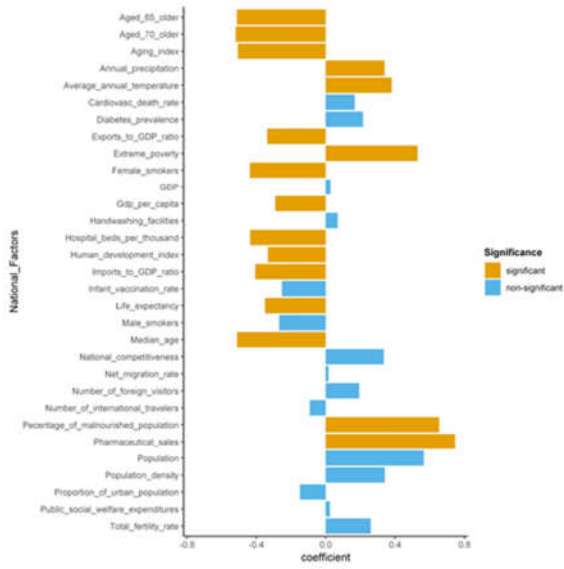**B** $\theta_1$  of  $\beta \sim$  National Factors(Segment1, Gompertz)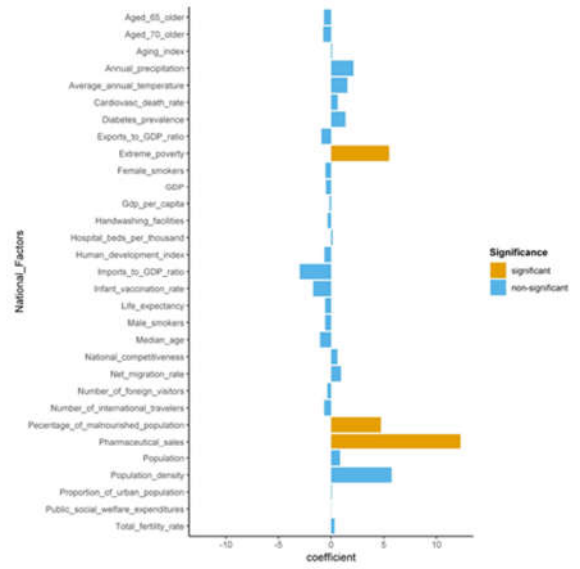**C** $\theta_1$  of  $\beta \sim$  National Factors(Segment2, Logistic)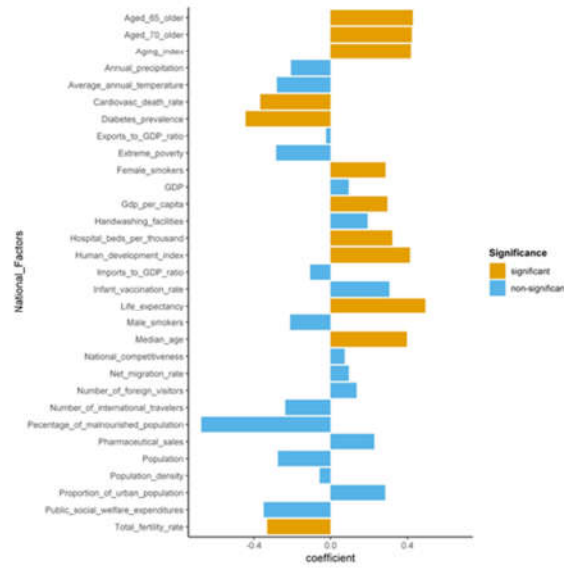**D** $\theta_1$  of  $\beta \sim$  National Factors(Segment2, Gompertz)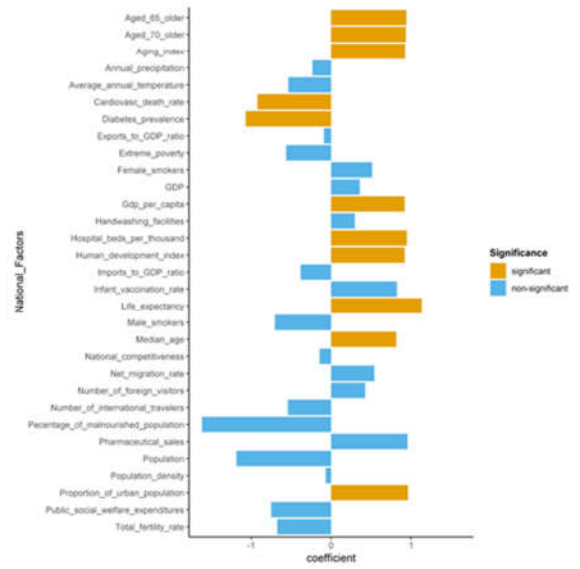**Figure S10.** Coefficients of the relationship between national factors and  $\beta$ .

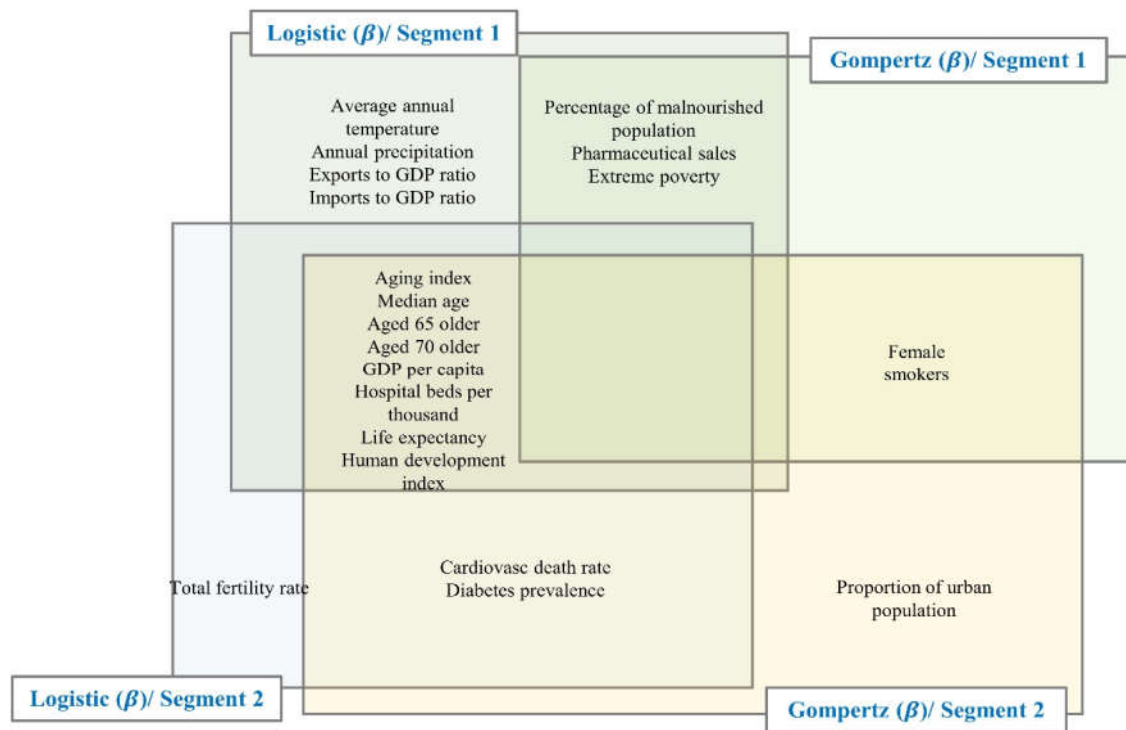

**Figure S11.** Significant national factors with  $\beta$
